# Supplementary material for: Sex differences in survival of patients with type 2 diabetes in primary care (ZODIAC-50)
Source: PubMed Central journal article supplement — BMJ Open. 2017 Oct 25;7(10):e015870. doi: 10.1136/bmjopen-2017-015870 (PMC5665232; doi:10.1136/bmjopen-2017-015870), 2017-10-25
Supplement: bmjopen-2017-015870.draft_revisions.pdf [file bmjopen-2017-015870.draft_revisions.pdf]

# BMJ Open

BMJ Open is committed to open peer review. As part of this commitment we make the peer review history of every article we publish publicly available.

When an article is published we post the peer reviewers' comments and the authors' responses online. We also post the versions of the paper that were used during peer review. These are the versions that the peer review comments apply to.

The versions of the paper that follow are the versions that were submitted during the peer review process. They are not the versions of record or the final published versions. They should not be cited or distributed as the published version of this manuscript.

BMJ Open is an open access journal and the full, final, typeset and author-corrected version of record of the manuscript is available on our site with no access controls, subscription charges or pay-per-view fees (<http://bmjopen.bmj.com>).

If you have any questions on BMJ Open's open peer review process please email [editorial.bmjopen@bmj.com](mailto:editorial.bmjopen@bmj.com)

# BMJ Open

## Sex differences in survival of patients with type 2 diabetes in primary care (ZODIAC-50).

|                                 |                                                                                                                                                                                                                                                                                                                                                                                                                                                                                         |
|---------------------------------|-----------------------------------------------------------------------------------------------------------------------------------------------------------------------------------------------------------------------------------------------------------------------------------------------------------------------------------------------------------------------------------------------------------------------------------------------------------------------------------------|
| Journal:                        | <i>BMJ Open</i>                                                                                                                                                                                                                                                                                                                                                                                                                                                                         |
| Manuscript ID                   | bmjopen-2017-015870                                                                                                                                                                                                                                                                                                                                                                                                                                                                     |
| Article Type:                   | Research                                                                                                                                                                                                                                                                                                                                                                                                                                                                                |
| Date Submitted by the Author:   | 05-Jan-2017                                                                                                                                                                                                                                                                                                                                                                                                                                                                             |
| Complete List of Authors:       | Hendriks, Steven; Isala, Diabetes centre van hateren, Kornelis; Langerhans Medical Research Group<br>Groenier, Klaas; University Medical Center Groningen, Department of General Practice<br>Landman, Gijs; Langerhans Medical Research Group; Gelre hospital<br>Maas, Angela; Radboud University Medical Center<br>Bilo, Henk; Isala, Diabetes centre; University Medical Center Groningen<br>Kleefstra, Nanne; Langerhans Medical Research Group; University Medical Center Groningen |
| <b>Primary Subject Heading</b>: | Diabetes and endocrinology                                                                                                                                                                                                                                                                                                                                                                                                                                                              |
| Secondary Subject Heading:      | Epidemiology                                                                                                                                                                                                                                                                                                                                                                                                                                                                            |
| Keywords:                       | type 2 diabetes, sex differences, relative survival                                                                                                                                                                                                                                                                                                                                                                                                                                     |
|                                 |                                                                                                                                                                                                                                                                                                                                                                                                                                                                                         |

SCHOLARONE™  
Manuscripts

1  
2  
3 Sex differences in survival of patients with type 2 diabetes in primary care (ZODIAC-50).  
4  
5  
6

7 Short title: Sex differences in survival with type 2 diabetes  
8  
9

10  
11 S.H. Hendriks MD<sup>1</sup>, K.J.J. van Hateren MD PhD<sup>2</sup>, K.H. Groenier PhD<sup>3</sup>, G.W.D. Landman  
12  
13 MD PhD<sup>2,4</sup>, A.H.E.M. Maas MD PhD<sup>5</sup>, H.J.G. Bilo MD PhD FRCP<sup>1,6,7</sup>, N. Kleefstra MD  
14  
15 PhD<sup>2,6</sup>  
16  
17  
18  
19

20 <sup>1</sup> Diabetes Centre, Isala, Zwolle, the Netherlands  
21

22 <sup>2</sup> Langerhans Medical Research Group, Zwolle, the Netherlands  
23

24 <sup>3</sup> Department of General Practice, University of Groningen and University Medical Center  
25  
26 Groningen, Groningen, the Netherlands  
27

28 <sup>4</sup> Department of Internal Medicine, Gelre hospital, Apeldoorn, the Netherlands  
29

30 <sup>5</sup> Department of Cardiology, Radboud University Medical Center, Nijmegen, the Netherlands  
31  
32

33 <sup>6</sup> Department of Internal Medicine, University of Groningen and University Medical Center  
34  
35 Groningen, Groningen, the Netherlands;  
36

37 <sup>7</sup> Department of Internal Medicine, Isala, Zwolle, the Netherlands  
38  
39  
40  
41

42 Corresponding author:  
43

44 Steven H. Hendriks  
45

46 Diabetes Centre, Isala  
47

48 Dr. Spanjaardweg 11, 2<sup>nd</sup> floor, 8025 BT Zwolle; the Netherlands  
49

50 T: +31-384247763; F: +31-384247695  
51

52 E: [s.hendriks@isala.nl](mailto:s.hendriks@isala.nl)  
53  
54  
55  
56  
57  
58  
59  
60

## Abstract

*Objective:* To investigate sex differences in survival of primary care treated patients with type 2 diabetes in the Netherlands.

*Setting:* Primary care.

*Participants:* A total of 1815 patients who participated in a prospective observational cohort study (ZODIAC) was included of which 56% was female. Inclusion took place in 1998, 1999 and 2001. Vital status was assessed in 2013.

*Main outcome measure:* Relative survival of men and women with T2DM. The relative survival rate was expressed as the ratio of observed survival of patients divided by the survival of the general population in the Netherlands with comparable age.

*Results:* After 14 years, 888 (49%) patients had died. The relative survival rate was 0.88 (0.81 – 0.94) for men and 0.82 (0.76 – 0.87) for women with type 2 diabetes after 14 years (p-value for difference between sexes = 0.169). In patients without a history of cardiovascular diseases the relative survival was 0.99 (0.94 – 1.05) in men and 0.92 (0.87 – 0.97) in women (p-value for difference between sexes = 0.046).

*Conclusions:* The survival of men and women with type 2 diabetes was 12% and 18% lower, respectively, after 14 years of follow-up compared to men and women in the general population. This corresponds to a decrease in median survival of 2.2 and 3.5 years in men and women respectively. Only for T2D patients without a history of CVD a significantly lower relative survival in women compared to men with T2D was found.

**Article summary: Strengths and limitations of this study**

- This study provides insight in the current situation concerning the survival of men and women with type 2 diabetes who are treated in primary care in the Netherlands.
- This study used the technique of relative survival analysis, hereby a comparison between the survival of type 2 diabetes patients and the expected survival of whole general population could be made.
- The survival rates of men and women in the general population were derived from mortality rates of the entire nation.
- The generalizability is limited to primary care.
- No data were known concerning clinical variables in the general population and therefore the results of the subgroups should be interpreted with caution.

## Introduction

Mortality rates in patients with type 2 diabetes (T2D) are higher compared to the general population, which is predominantly caused by a higher occurrence of cardiovascular diseases in patients with T2D (1–3). This excess mortality rate is described to be more pronounced in women compared to men with T2D (2–5). In a recent meta-analysis, the relative risk for mortality of incident coronary heart disease was 2.8 in women and 2.0 in men compared to men and women without diabetes, respectively (2).

Current knowledge on sex differences in mortality is mostly based on older cohort studies.

Whether these results are still reflecting current practice is less clear, as the care for patients with T2D has significantly improved over the last years (6). In the Netherlands, most patients with T2D receive protocol-based treatment exclusively in primary care. The mortality in this population is low, which is probably the result of a general improvement in quality of diabetes care over the last years (7). It is less well established whether sex differences in mortality also exist in well-controlled primary care patients. Only a few studies have been recently conducted in countries with a comparable care system to the Netherlands (8–10). A study from Norway also described a more pronounced excess mortality rate in women with T2D, however this study also included secondary care treated patients (10). A retrospective study from the U.K in primary care found only a slightly higher hazard ratio for all-cause mortality in women than in men with T2D, when compared with non-diabetics (8).

The aim of the present study was to investigate the survival of prospectively followed men and women with T2D, treated in primary care, compared to men and women in the general population.

## Materials and Methods

### *Study population and design*

1  
2  
3 The study population consisted of patients who were included in the Zwolle Outpatient  
4 Diabetes Project Integrating Available Care (ZODIAC) study. This study was initiated in  
5 1998, in the Zwolle region of the Netherlands. The design and details of this study have been  
6 published previously (11). In this study, general practitioners were assisted by hospital-based  
7 diabetes specialist nurses in their care of patients with T2D. In the first year, 1,143 patients  
8 with T2D were included in this prospective cohort study. Another 127 and 545 patients with  
9 T2D entered this study in 1999 and 2001 respectively, resulting in a combined cohort of 1,815  
10 patients. All patients with T2D were selected from general practices in Zwolle region of the  
11 Netherlands. Patients with a very short life expectancy or insufficient cognitive capabilities  
12 were excluded from participation as the care for these patients has not been delegated to  
13 diabetes specialist nurses. Whether the life expectancy was long enough to be included in the  
14 ZODIAC study was based on the judgement of the general practitioners.

15  
16  
17  
18  
19  
20  
21  
22  
23  
24  
25  
26  
27  
28  
29  
30  
31  
32  
33  
34  
35  
36  
37  
38  
39  
40  
41  
42  
43  
44  
45  
46  
47  
48  
49  
50  
51  
52  
53  
54  
55  
56  
57  
58  
59  
60

The survival of this cohort was compared with the expected survival of men and women with the same age from the general population in the Netherlands. These expected survival rates were derived from data provided by Statistics Netherlands. This organization provides survival rates for men and women of every age in the Netherlands (12).

#### *Data collection and measurements*

Before participating in the ZODIAC study, T2D was already diagnosed in all individuals by their general practitioners based on the guidelines of the Dutch College of General Practitioners (2 times a fasting plasma glucose level  $\geq 7$  mmol/l or one time a non-fasting plasma glucose level  $\geq 11.1$  mmol/l accompanied by symptoms of hyperglycemia) (13).

Information on cardiovascular diseases, smoking and medication use was collected during the check-up of the patient by the general practitioner or practice nurse at baseline of the study.

Patients were considered to have a history of CVD if a history of angina pectoris, myocardial

1  
2  
3 infarction, percutaneous transluminal coronary angioplasty, coronary artery bypass grafting,  
4  
5 stroke or a transient ischemic attack was documented in the patient record of the general  
6  
7 practice. Data on heart failure was not collected as it was not properly documented at  
8  
9 baseline. Smoking was included in the analyses as a categorical variable (yes/no). Laboratory  
10  
11 and physical assessment data were collected at baseline during the annual check-up of the  
12  
13 patients by their general practitioner and practice nurse and included non-fasting lipid profile,  
14  
15 glycated hemoglobin (HbA1c), serum creatinine (SCr), urinary albumin-to-creatinine ratio  
16  
17 (ACR), blood pressure and information about neuropathy and diabetic retinopathy. ACR was  
18  
19 measured using immunonephelometry (Behring Nephelometer; Mannheim, Germany), and  
20  
21 blood pressure was measured twice with a Welch Allyn sphygmomanometer in the supine  
22  
23 position after at least 5 minutes of rest. Foot sensibility was tested with 5.07 Semmes-  
24  
25 Weinstein monofilaments. Neuropathy was defined as two or more errors in a test of three, at  
26  
27 least at one foot. Diabetic retinopathy (DRP) was investigated with a retinal camera and the  
28  
29 fundus photos were judged by an ophthalmologist. Microalbuminuria was defined as an  
30  
31 albumin-to-creatinine ratio between 3.5 and 35 mg/mmol for women and between 2.5 and 25  
32  
33 mg/mmol for men. Macroalbuminuria was defined as an albumin-to-creatinine ratio > 35  
34  
35 mg/mmol for women and > 25 mg/mmol for men. The same methods were used in each  
36  
37 baseline year to measure the laboratory and physical assessment data.  
38  
39  
40  
41  
42  
43  
44

#### 45 *Clinical endpoints*

46  
47 The primary end-point was the relative survival rate of men and women with T2D compared  
48  
49 with the general population in the Netherlands. Secondary end-points were the relative  
50  
51 survival rates of patients with T2D in different subgroups, and the median survival of men  
52  
53 and women. Subgroups for the relative survival analyses were defined for: age (<60, 60-75  
54  
55 and >75 years), Body Mass Index (BMI) (<25, 25-30 and >30 kg/m<sup>2</sup>), smoking, history of  
56  
57  
58  
59  
60



1  
2  
3 CVD, albuminuria (normo-, micro- and macroalbuminuria), microvascular complications  
4  
5 (defined as the presence of albuminuria, neuropathy or DRP) and for patients with a low CVD  
6  
7 risk (defined as non-smoking patients without a history of CVD and microvascular  
8  
9 complications). In 2013, vital status and cause of death of T2D patients were retrieved from  
10  
11 records maintained by the hospital and the general practitioners or from the nationwide  
12  
13 Municipal Personal Records Database. Causes of death were coded according to the  
14  
15 International Classification of Diseases, 9th revision (ICD-9). Cardiovascular death was  
16  
17 defined as death in which the principal cause of death was cardiovascular in nature, using  
18  
19 ICD-9 codes 390-459.  
20  
21  
22  
23  
24

#### 25 *Statistical analyses*

26  
27 Statistical analyses were performed using SPSS version 20.0 for Windows (SPSS Inc.,  
28  
29 Chicago, Illinois, USA) and Stata 14 (StataCorp, College Station, Texas, USA). Baseline  
30  
31 results were expressed as mean with standard deviation (SD) or median with interquartile  
32  
33 range [IQR] for normally distributed and non-normally distributed data, respectively.  
34  
35 Differences were considered to be significant at a p-value of  $<0.05$ . Survival was calculated  
36  
37 using relative survival analysis (14). The relative survival rate was calculated by measuring  
38  
39 the ratio of survival of patients observed in our ZODIAC cohort in comparison to the survival  
40  
41 of men and women with corresponding age in the same baseline year in the general  
42  
43 population in the Netherlands. First, interval-specific and cumulative survival rates were  
44  
45 measured for both the study population and the general population, using the Hakulinen  
46  
47 method (15). The interval-specific observed survival rate for each follow-up year of the study  
48  
49 population was calculated based on the number of patients at risk, the number of deaths and  
50  
51 the number of patients lost to follow-up in each year. The interval-specific expected survival  
52  
53 rate for the general population was calculated using yearly-specific survival data of the  
54  
55  
56  
57  
58  
59  
60

1  
2  
3 general population (12). Consequently, the cumulative survival rate was measured for both  
4  
5 the study group and the general population. Finally, the relative cumulative survival rate was  
6  
7 calculated. The relative cumulative survival rate for the total study population is described for  
8  
9 each of the 14 follow-up years for men and women separately. To investigate whether the  
10  
11 relative survival was significant different between sexes, the p-value was calculated at 14  
12  
13 years of follow-up. For the subgroup analyses, the relative cumulative survival rate is only  
14  
15 described after 10 years of follow-up. Cumulative survival rates after 10 years are described  
16  
17 due to the fact that 14 years survival data were only available for patients who were included  
18  
19 in 1998. The relative cumulative survival rates after 10 years are therefore more reliable. P-  
20  
21 values for the differences between sexes were calculated at 10 years of follow-up for the  
22  
23 subgroup analyses. An estimation of the median survival of the study population was  
24  
25 calculated using linear interpolation. For the general population, linear extrapolation with the  
26  
27 average difference between the cumulative survivals of the general population was conducted  
28  
29 first, before using linear interpolation to estimate the median survival.  
30  
31  
32  
33  
34  
35

## 36 **Results**

37  
38 Baseline results of the study population are described in Table 1. Fifty-six percent of the  
39  
40 patients were female. Mean age was 65.0 (11.8) years in men and 68.6 (11.6) years in women.  
41  
42 The median diabetes duration was 4.0 [1.8-9.0] and 5.0 [2.0-10.0] years in men and women,  
43  
44 respectively. Men smoked more frequently and had also more often albuminuria and a  
45  
46 previous history of CVD compared to women. Women had a higher systolic blood pressure, a  
47  
48 higher BMI, and more often diabetic retinopathy than men. Men were more often on diet  
49  
50 treatment only while women were more often on insulin. Lipid lowering drugs and  
51  
52 antiplatelet drugs were more often used in men.  
53  
54  
55  
56  
57  
58  
59  
60

### *Relative survival analyses*

The incidence rate for all-cause mortality was 7.4 (6.7 – 8.2) and 7.2 (6.5 – 7.8) per 100 person years in men and women with T2D, respectively. The incidence rate for CVD mortality was 3.1 (2.7 - 3.6) and 3.0 (2.6 - 3.4) per 100 person years in men and women with T2D, respectively. The comparison between the survival of the patients with T2D and the general population is presented in Table 2 and Fig. 1 for men and women separately. After 14 years, the relative survival rate was 0.88 (95%CI: 0.81 - 0.94) for men and 0.82 (95%CI: 0.76 – 0.87) for women with T2D (p-value for difference between sexes = 0.169). The estimated median survival of men (mean age: 65.0) and women (mean age: 68.8) in the study population was 13.8 and 13.0 years, respectively. In the general population, the estimated median survival of men and women was 16.0 and 16.5 year respectively.

### *Subgroup analyses*

The relative survival rate after 10 years for different subgroups is described in Table 3 and Fig. 2 for men and women separately. In the subgroup of T2D patients without microvascular complications, the relative survival rate of men and women with T2D was 1.01 (95%CI: 0.95 – 1.07) and 0.98 (95%CI: 0.93 – 1.03), respectively (p = 0.488). In patients with microvascular complications, the relative survival rate decreased to 0.82 (95%CI: 0.74 – 0.89) for men and 0.77 (95%CI: 0.71 – 0.84) for women with T2D (p = 0.395). In men and women with low CVD risk (defined as non-smoking patients without a history of CVD and microvascular complications) the relative survival rate was 1.08 (95%CI: 1.00 – 1.14) and 1.01 (0.94 – 1.07), respectively (p = 0.106). The relative survival rates of men <60 years, of men with a BMI between 25 and 30 kg/m<sup>2</sup>, of men without a history of CVD, and of men without albuminuria were not significantly different from men in the general population. The relative survival rate in women in all these categories was significantly lower compared to

1  
2  
3 women in the general population. For patients without a history of CVD, the relative survival  
4  
5 was significantly lower in women with T2D compared to men ( $p = 0.046$ ).  
6  
7

## 8 9 **Discussion**

10  
11 In primary care treated T2D patients, the relative survival of men and women was 12% and  
12  
13 18% lower after 14 years of follow-up compared to age-matched men and women in the  
14  
15 general population, respectively. This translates into an overall decrease in median survival of  
16  
17 2.2 years in men and 3.5 years in women with T2D compared to men and women in the  
18  
19 general population. Although the relative survival of women with T2D seems to be lower than  
20  
21 in male counterparts, no significant difference between sexes was found in the total study  
22  
23 population. The survival rate in certain subgroups of men with T2D (young age, no  
24  
25 albuminuria, no history of CVD, BMI 25-30) was comparable to the survival rate of men in  
26  
27 the general population. In women in these subgroups the relative survival was significantly  
28  
29 lower compared to women without T2D. Only for T2D patients without a history of CVD a  
30  
31 significantly lower relative survival in women compared to men with T2D was found.  
32  
33  
34  
35  
36

37  
38 Many studies have described a higher excess mortality rate in women than in men with T2D  
39  
40 (4,5,16). In our study, a higher impact of T2D in women was only found in the subgroup of  
41  
42 patients without a history of CVD. In subgroups of patients < 60 year of age, without  
43  
44 albuminuria and with a BMI between 25-30 kg/m<sup>2</sup> the relative survival of women with T2D  
45  
46 was lower compared to women in the general population but not lower compared to the  
47  
48 relative survival of men with T2D. The comparable survival of men with T2D without a  
49  
50 history of CVD to men in the general population has partly been described before by Kalyani  
51  
52 et al. (17). In a population without ischemic heart disease, they found an increased risk for the  
53  
54 combined outcome of ischemic heart disease and mortality in women with diabetes compared  
55  
56 to women without diabetes whereas they found no differences in men.  
57  
58  
59  
60

1  
2  
3  
4  
5 The decrease in median survival which is found in our study seems to be smaller than those  
6  
7 seen in previous studies. Results from the Framingham Heart Study showed that men and  
8  
9 women with diabetes lived on average 7.5 (95CI: 5.5 to 9.5) and 8.2 (95CI: 6.1 to 10.4) years  
10  
11 less compared to men and women without diabetes. However, this cohort started between  
12  
13 1948 and 1951 when treatment options for T2D were limited. In a more recent study from  
14  
15 Canada, for both men and women at the age of 55 on average a 5.0 (95CI: 4.9 to 5.1) and 6.0  
16  
17 (95CI: 5.9 to 6.1) years lower life expectancy was estimated compared to men and women  
18  
19 without diabetes (18). Although patient characteristics differ between studies and various  
20  
21 methods were used to measure survival, it may indicate that the loss of life years due to  
22  
23 diabetes is decreasing in both men and women.  
24  
25  
26  
27  
28

29  
30 Although different theories have been described which may explain the observed sex  
31  
32 difference in the impact of diabetes on survival, it is still not completely understood.  
33  
34 Undertreatment of women with T2D is mentioned as a possible explaining factor. A lower  
35  
36 prescription percentage for aspirin and lipid lowering drugs was found in women compared to  
37  
38 men with T2D (19). However, in a recent study in primary care we did not find significant sex  
39  
40 differences in these prescribed medications (20). The sex difference in survival may also be  
41  
42 explained by a greater excess in cardiovascular risk factors between women with and without  
43  
44 T2D compared to their male counterparts (4,21). This greater excess in risk factors is  
45  
46 probably the result of a more favorable risk factor profile and a lower insulin resistance in  
47  
48 women without diabetes compared to men (21,22). Although the relatively higher risk for  
49  
50 women with T2D for fatal ischemic heart disease remained significant in various meta-  
51  
52 analyses after adjustment for other cardiovascular risk factors, it may still be an explanation as  
53  
54 only traditional risk factors were taken into account (2,4). The lower relative survival could  
55  
56  
57  
58  
59  
60

1  
2  
3 also be a result of a higher prevalence of obesity in women with T2D. In the Netherlands, the  
4 prevalence of obesity is described to be 25 to 50% higher in women compared to men with  
5 T2D, whereas the prevalence of overweight is 20 to 35% higher in men compared to women  
6 in different age categories (20). Knowing that overweight is associated with a lower mortality  
7 risk and obesity with a higher mortality risk compared to patient with a normal weight, this  
8 could possibly be one of the explaining factors for the higher relative mortality rate in women  
9 with T2D (23). Finally, the relative higher mortality in women with T2D may be a result of  
10 underdiagnosis of ischemic heart disease in women. Women with T2D have less obstructive  
11 coronary disease compared to men, with higher rates of microvascular coronary dysfunction  
12 that may be more difficult to diagnose and treat (24). Also, a higher prevalence of  
13 undiagnosed heart failure with preserved ejection fraction (HFpEF) is described in women  
14 compared to men with T2D (25). When focusing on the common symptoms and diagnostic  
15 criteria for ischemic heart disease and HFpEF, these diagnoses could be easily missed in  
16 women. This may lead to undertreatment of women, resulting in a higher mortality when  
17 having T2D.  
18  
19  
20  
21  
22  
23  
24  
25  
26  
27  
28  
29  
30  
31  
32  
33  
34  
35  
36  
37

38 Some limitations should be mentioned. According to Hakulinen, relative survival is the ratio  
39 of the observed survival in a group of patients compared with the expected survival in a group  
40 of individuals in the general population, who are comparable with the patients concerning all  
41 possible factors affecting survival, except for the disease of interest (15). Our choice to  
42 compare survival of patients with T2D to the general population can therefore be criticized.  
43 However, the underlying assumption by the use of the expected survivals of the general  
44 population is that the deaths directly due to T2D are a negligible proportion of all deaths in  
45 the general population. Furthermore, no data were known concerning clinical variables in the  
46 general population, as we did not use a specific control group but expected survival rates  
47  
48  
49  
50  
51  
52  
53  
54  
55  
56  
57  
58  
59  
60

1  
2  
3 which were derived from mortality rates of the entire nation. Therefore the results of the  
4  
5 subgroups should be interpreted with caution. The study population consisted only of patients  
6  
7 with T2D who are treated in primary care. Patients in secondary care often have worse  
8  
9 manifestations of T2D and more often macrovascular disease and will probably have a lower  
10  
11 survival. Furthermore, patients with a very short life expectancy or insufficient cognitive  
12  
13 capabilities were also excluded from participation. Although these limitations imply that the  
14  
15 generalizability of our results is limited to primary care, it is still representative for a large  
16  
17 part of the T2D population due to the fact that the majority (>85%) of the patients with T2D is  
18  
19 treated in primary care in the Netherlands (26).  
20  
21  
22  
23  
24

25 In conclusion, the relative survival in men and women with T2D compared to the general  
26  
27 population was 12% and 18% lower. The results of this study further show that survival in  
28  
29 subgroups of men (i.e. younger men, no albuminuria, no history CVD, BMI between 25 and  
30  
31 30) is comparable to men in the general population, while the survival in women in these  
32  
33 subgroups is still lower compared to women in the general population. Only in women with  
34  
35 T2D without a history of CVD the impact of diabetes on survival is higher compared to men  
36  
37 with T2D.  
38  
39  
40  
41  
42

43 Author Contributions: SHH, KJJH, KHG, HJGB and NK designed the study. SHH, KJJH and  
44  
45 GWDL acquired the data. SHH, KJJH and KHG analysed the data. SHH, KJJH, KHG,  
46  
47 GWDL, AHEMM, HJGB and NK interpreted the data. SHH and KJJH drafted the  
48  
49 manuscript. KHG, GWDL, AHEMM, HJGB and NK reviewed and edited the manuscript. All  
50  
51 authors read and approved the final manuscript.  
52  
53

54 Funding statement: This research received no specific grant from any funding agency in the  
55  
56 public, commercial or not-for-profit sectors.  
57  
58  
59  
60

1  
2  
3 Competing interests: None declared.  
4

5 Ethics approval: This study was approved by the local ethical committee of Isala, Zwolle, the  
6  
7 Netherlands. All patients gave written informed consent.  
8

9 Data sharing statement: No additional data are available.  
10  
11

## 12 13 14 **References**

- 15  
16 1. Barnett KN, Ogston SA, McMurdo MET, Morris AD, Evans JMM. A 12-year follow-up  
17 study of all-cause and cardiovascular mortality among 10,532 people newly diagnosed  
18 with Type 2 diabetes in Tayside, Scotland. *Diabet Med J Br Diabet Assoc.* 2010  
19 Oct;27(10):1124–9.  
20
- 21  
22 2. Peters SAE, Huxley RR, Woodward M. Diabetes as risk factor for incident coronary  
23 heart disease in women compared with men: a systematic review and meta-analysis of  
24 64 cohorts including 858,507 individuals and 28,203 coronary events. *Diabetologia.*  
25 2014 Aug;57(8):1542–51.  
26
- 27  
28 3. Roche MM, Wang PP. Sex differences in all-cause and cardiovascular mortality,  
29 hospitalization for individuals with and without diabetes, and patients with diabetes  
30 diagnosed early and late. *Diabetes Care.* 2013 Sep;36(9):2582–90.  
31
- 32  
33 4. Huxley R, Barzi F, Woodward M. Excess risk of fatal coronary heart disease associated  
34 with diabetes in men and women: meta-analysis of 37 prospective cohort studies. *BMJ.*  
35 2006 Jan 14;332(7533):73–8.  
36
- 37  
38 5. Lee WL, Cheung AM, Cape D, Zinman B. Impact of diabetes on coronary artery disease  
39 in women and men: a meta-analysis of prospective studies. *Diabetes Care.* 2000  
40 Jul;23(7):962–8.  
41
- 42  
43 6. van Hateren KJJ, Drion I, Kleefstra N, Groenier KH, Houweling ST, van der Meer K, et  
44 al. A prospective observational study of quality of diabetes care in a shared care setting:  
45 trends and age differences (ZODIAC-19). *BMJ Open.* 2012;2(4).  
46
- 47  
48 7. Lutgers HL, Gerrits EG, Sluiter WJ, Ubink-Veltmaat LJ, Landman GWD, Links TP, et  
49 al. Life expectancy in a large cohort of type 2 diabetes patients treated in primary care  
50 (ZODIAC-10). *PloS One.* 2009;4(8):e6817.  
51
- 52  
53 8. Liang H, Vallarino C, Joseph G, Manne S, Perez A, Zhang S. Increased risk of  
54 subsequent myocardial infarction in patients with type 2 diabetes: a retrospective cohort  
55 study using the U.K. General Practice Research Database. *Diabetes Care.*  
56 2014;37(5):1329–37.  
57
- 58  
59 9. Hyvärinen M, Tuomilehto J, Laatikainen T, Söderberg S, Eliasson M, Nilsson P, et al.  
60 The impact of diabetes on coronary heart disease differs from that on ischaemic stroke  
with regard to the gender. *Cardiovasc Diabetol.* 2009;8:17.



10. Madssen E, Vatten L, Nilsen TI, Midthjell K, Wiseth R, Dale AC. Abnormal glucose regulation and gender-specific risk of fatal coronary artery disease in the HUNT 1 study. *Scand Cardiovasc J SCJ*. 2012 Aug;46(4):219–25.
11. Ubink-Veltmaat LJ, Bilo HJG, Groenier KH, Rischen RO, Meyboom-de Jong B. Shared care with task delegation to nurses for type 2 diabetes: prospective observational study. *Neth J Med*. 2005 Mar;63(3):103–10.
12. Data published by Statistics Netherlands. In Dutch: “Centraal Bureau voor de Statistiek”. [Internet]. Available from: <http://statline.cbs.nl/Statweb/selection/?DM=SLNL&PA=70701NED&VW=T>
13. Rutten GEHM, Verhoeven S, Heine RJ, de Grauw WJC, Cromme PVM, Reenders K, et al. NHG-Standaard Diabetes Mellitus Type 2. Eerste herziening. *Huisarts Wet*. 1999;42(2):67–84.
14. Hockey R, Tooth L, Dobson A. Relative survival: a useful tool to assess generalisability in longitudinal studies of health in older persons. *Emerg Themes Epidemiol*. 2011;8(1):3.
15. Hakulinen T. Cancer survival corrected for heterogeneity in patient withdrawal. *Biometrics*. 1982 Dec;38(4):933–42.
16. Kanaya AM, Grady D, Barrett-Connor E. Explaining the sex difference in coronary heart disease mortality among patients with type 2 diabetes mellitus: a meta-analysis. *Arch Intern Med*. 2002 Aug 12;162(15):1737–45.
17. Kalyani RR, Lazo M, Ouyang P, Turkbey E, Chevalier K, Brancati F, et al. Sex differences in diabetes and risk of incident coronary artery disease in healthy young and middle-aged adults. *Diabetes Care*. 2014;37(3):830–8.
18. Loukine L, Waters C, Choi BC, Ellison J. Impact of diabetes mellitus on life expectancy and health-adjusted life expectancy in Canada. *Popul Health Metr*. 2012;10(1):7.
19. Wexler DJ, Grant RW, Meigs JB, Nathan DM, Cagliero E. Sex disparities in treatment of cardiac risk factors in patients with type 2 diabetes. *Diabetes Care*. 2005 Mar;28(3):514–20.
20. Hendriks SH, van Hateren KJJ, Groenier KH, Houweling ST, Maas AHEM, Kleefstra N, et al. Sex Differences in the Quality of Diabetes Care in the Netherlands (ZODIAC-45). *PloS One*. 2015;10(12):e0145907.
21. Wannamethee SG, Papacosta O, Lawlor DA, Whincup PH, Lowe GD, Ebrahim S, et al. Do women exhibit greater differences in established and novel risk factors between diabetes and non-diabetes than men? The British Regional Heart Study and British Women’s Heart Health Study. *Diabetologia*. 2012 Jan;55(1):80–7.
22. Orchard TJ, Becker DJ, Kuller LH, Wagener DK, LaPorte RE, Drash AL. Age and sex variations in glucose tolerance and insulin responses: parallels with cardiovascular risk. *J Chronic Dis*. 1982 Feb;35(2):123–32.

- 1  
2  
3 23. Flegal KM, Kit BK, Orpana H, Graubard BI. Association of all-cause mortality with  
4 overweight and obesity using standard body mass index categories: a systematic review  
5 and meta-analysis. *JAMA*. 2013 Jan 2;309(1):71–82.  
6  
7 24. Tamis-Holland JE, Lu J, Korytkowski M, Magee M, Rogers WJ, Lopes N, et al. Sex  
8 differences in presentation and outcome among patients with type 2 diabetes and  
9 coronary artery disease treated with contemporary medical therapy with or without  
10 prompt revascularization: a report from the BARI 2D Trial (Bypass Angioplasty  
11 Revascularization Investigation 2 Diabetes). *J Am Coll Cardiol*. 2013 Apr  
12 30;61(17):1767–76.  
13  
14 25. Boonman-de Winter LJM, Rutten FH, Cramer MJM, Landman MJ, Liem AH, Rutten  
15 GEHM, et al. High prevalence of previously unknown heart failure and left ventricular  
16 dysfunction in patients with type 2 diabetes. *Diabetologia*. 2012 Aug;55(8):2154–62.  
17  
18 26. InEen. In Dutch: Transparante ketenzorg diabetes mellitus, COPD en VRM rapportage  
19 zorggroepen over 2013. 2014 Jun.  
20  
21  
22  
23  
24  
25  
26  
27  
28  
29  
30  
31  
32  
33  
34  
35  
36  
37  
38  
39  
40  
41  
42  
43  
44  
45  
46  
47  
48  
49  
50  
51  
52  
53  
54  
55  
56  
57  
58  
59  
60

## Tables and figures

Table 1. Baseline characteristics of the study population.

|                                          | Total (n = 1815)    | Men (n = 800)       | Women (n = 1015)    | p-value |
|------------------------------------------|---------------------|---------------------|---------------------|---------|
| Age (years)                              | 67.0 ( $\pm$ 11.8)  | 65.0 ( $\pm$ 11.8)  | 68.6 ( $\pm$ 11.6)  | <0.001  |
| Diabetes duration (years)                | 4.0 (2.0-9.0)       | 4.0 (1.8-9.0)       | 5.0 (2.0-10.0)      | 0.017   |
| History of CVD                           | 605 (33.3)          | 307 (38.4)          | 298 (29.4)          | <0.001  |
| Smoking                                  | 342 (19.0)          | 206 (26.0)          | 136 (13.5)          | <0.001  |
| BMI (kg/m <sup>2</sup> )                 | 29.1 ( $\pm$ 4.8)   | 28.2 ( $\pm$ 4.1)   | 29.9 ( $\pm$ 5.2)   | <0.001  |
| SBP (mmHg)                               | 151.5 ( $\pm$ 24.4) | 147.2 ( $\pm$ 23.4) | 155.0 ( $\pm$ 24.5) | <0.001  |
| HbA1c (mmol/mol)                         | 7.0 (6.3-8.1)       | 6.9 (6.2-8.1)       | 7.1 (6.4-8.1)       | 0.131   |
| Creatinine ( $\mu$ mol/L)                | 92.0 (82.0-104.0)   | 98.0 (89.0-109.0)   | 86.0 (77.0-97.0)    | <0.001  |
| Chol-HDL ratio                           | 4.8 (3.9-5.9)       | 4.9 (4.0-6.0)       | 4.7 (3.8-5.8)       | 0.001   |
| Retinopathy                              | 190 (10.9)          | 70 (9.1)            | 120 (12.3)          | 0.030   |
| Microalbuminuria                         | 544 (30.8)          | 267 (34.0)          | 277 (28.3)          | 0.011   |
| Macroalbuminuria                         | 114 (6.5)           | 68 (8.7)            | 46 (4.7)            | 0.001   |
| Neuropathy                               | 477 (26.6)          | 212 (26.7)          | 265 (26.6)          | 0.931   |
| Microvascular complications <sup>#</sup> | 1012 (57.7)         | 466 (59.7)          | 546 (56.1)          | 0.120   |
| Low CVD risk*                            | 424 (23.4)          | 154 (19.3)          | 270 (26.6)          | <0.001  |
| DM treatment                             |                     |                     |                     |         |
| Diet                                     | 318 (17.5)          | 158 (19.8)          | 160 (15.8)          | 0.026   |
| Oral only                                | 1230 (67.8)         | 540 (67.6)          | 690 (68.0)          | 0.834   |
| Insulin                                  | 262 (14.5)          | 99 (12.4)           | 163 (16.1)          | 0.028   |
| ACEi/ARB                                 | 433 (27.1)          | 179 (25.1)          | 254 (28.7)          | 0.108   |
| Lipid lowering drugs                     | 278 (15.6)          | 139 (17.7)          | 139 (13.9)          | 0.030   |
| Antiplatelet drugs                       | 279 (15.6)          | 139 (17.6)          | 140 (14.0)          | 0.035   |
| Death                                    | 888 (48.9)          | 381 (47.6)          | 507 (50.0)          | 0.325   |
| CVD death                                | 374 (20.6)          | 161 (20.1)          | 213 (21.0)          | 0.653   |

Values are depicted as n (%), mean ( $\pm$  SD), or median (IQR).

Abbreviations: CVD: cardiovascular disease; BMI: body mass index; SBP: systolic blood pressure; Chol-HDL: cholesterol-HDL; DM: diabetes mellitus; ACEi: angiotensin-converting enzyme inhibitor; ARB: angiotensin receptor blocker.

<sup>#</sup> Defined as the presence of albuminuria, neuropathy or DRP; \* defined as non-smoking patients without a history of CVD and microvascular complications.

**Table 2. Relative survival for men and women with T2D compared with men and women with the same age from the general population.**

| Men       |     |       |                   |      |      |                              | Women |       |                   |      |      |                              |
|-----------|-----|-------|-------------------|------|------|------------------------------|-------|-------|-------------------|------|------|------------------------------|
| Follow-up | N   | Death | Lost to follow-up | COS  | CES  | Relative cumulative survival | N     | Death | Lost to follow-up | COS  | CES  | Relative cumulative survival |
| 0-1       | 800 | 36    | 1                 | 0.96 | 0.97 | 0.99 (0.97 - 1.00)           | 1015  | 35    | 2                 | 0.97 | 0.97 | 0.99 (0.98 - 1.00)           |
| 1-2       | 763 | 38    | 0                 | 0.91 | 0.93 | 0.97 (0.95 - 0.99)           | 978   | 32    | 0                 | 0.93 | 0.94 | 0.99 (0.97 - 1.00)           |
| 2-3       | 725 | 38    | 0                 | 0.86 | 0.90 | 0.96 (0.93 - 0.98)           | 946   | 53    | 0                 | 0.88 | 0.92 | 0.96 (0.94 - 0.98)           |
| 3-4       | 687 | 28    | 1                 | 0.82 | 0.87 | 0.95 (0.92 - 0.98)           | 893   | 40    | 2                 | 0.84 | 0.89 | 0.95 (0.92 - 0.97)           |
| 4-5       | 658 | 31    | 0                 | 0.79 | 0.83 | 0.94 (0.91 - 0.98)           | 851   | 41    | 0                 | 0.80 | 0.86 | 0.94 (0.91 - 0.96)           |
| 5-6       | 627 | 35    | 1                 | 0.74 | 0.80 | 0.93 (0.89 - 0.96)           | 810   | 52    | 4                 | 0.75 | 0.83 | 0.91 (0.88 - 0.94)           |
| 6-7       | 591 | 30    | 3                 | 0.70 | 0.77 | 0.91 (0.87 - 0.95)           | 754   | 53    | 6                 | 0.72 | 0.79 | 0.90 (0.87 - 0.94)           |
| 7-8       | 558 | 26    | 1                 | 0.67 | 0.74 | 0.91 (0.86 - 0.95)           | 715   | 40    | 0                 | 0.68 | 0.76 | 0.89 (0.85 - 0.92)           |
| 8-9       | 531 | 22    | 0                 | 0.64 | 0.71 | 0.91 (0.86 - 0.95)           | 675   | 38    | 3                 | 0.64 | 0.73 | 0.87 (0.83 - 0.91)           |
| 9-10      | 509 | 20    | 0                 | 0.62 | 0.68 | 0.91 (0.86 - 0.96)           | 634   | 30    | 0                 | 0.61 | 0.70 | 0.86 (0.82 - 0.91)           |
| 10-11     | 489 | 15    | 58                | 0.60 | 0.65 | 0.92 (0.86 - 0.97)           | 604   | 35    | 62                | 0.57 | 0.67 | 0.85 (0.80 - 0.89)           |
| 11-12     | 416 | 22    | 101               | 0.56 | 0.62 | 0.90 (0.85 - 0.96)           | 507   | 28    | 93                | 0.54 | 0.64 | 0.84 (0.79 - 0.88)           |
| 12-13     | 293 | 17    | 3                 | 0.53 | 0.59 | 0.89 (0.83 - 0.95)           | 386   | 26    | 4                 | 0.50 | 0.61 | 0.82 (0.77 - 0.88)           |
| 13-14     | 273 | 16    | 60                | 0.49 | 0.56 | 0.88 (0.81 - 0.94)           | 356   | 18    | 97                | 0.47 | 0.58 | 0.82 (0.76 - 0.87)           |

Abbreviations: N: number of patients at risk; COS: cumulative observed survival; CES: cumulative expected survival.

**Table 3. Relative survival after 10 years for different subgroups.**

| Category                       | Men |                            | Women |                            | p-value <sup>#</sup> |
|--------------------------------|-----|----------------------------|-------|----------------------------|----------------------|
|                                | N   | Relative survival (95% CI) | N     | Relative survival (95% CI) |                      |
| Age < 60                       | 276 | 0.98 (0.94 – 1.01)         | 224   | 0.93 (0.87 – 0.96)         | 0.052                |
| Age ≥ 60 and < 75              | 337 | 0.89 (0.81 – 0.96)         | 448   | 0.89 (0.84 – 0.95)         | 0.870                |
| Age ≥ 75                       | 187 | 0.59 (0.42 – 0.80)         | 343   | 0.68 (0.56 – 0.79)         | 0.909                |
| Diabetes duration <2 years     | 206 | 0.99 (0.92 – 1.06)         | 232   | 0.97 (0.90 – 1.03)         | 0.626                |
| BMI < 25                       | 174 | 0.79 (0.66 – 0.92)         | 169   | 0.80 (0.67 – 0.91)         | 0.914                |
| BMI 25-30                      | 392 | 0.94 (0.87 – 1.01)         | 377   | 0.87 (0.79 – 0.94)         | 0.126                |
| BMI > 30                       | 232 | 0.91 (0.83 – 0.99)         | 465   | 0.89 (0.83 – 0.94)         | 0.616                |
| Non-smokers                    | 583 | 0.93 (0.87 – 0.99)         | 869   | 0.86 (0.82 – 0.92)         | 0.121                |
| Smokers                        | 206 | 0.84 (0.75 – 0.92)         | 136   | 0.84 (0.73 – 0.92)         | 0.931                |
| No history of CVD              | 492 | 0.99 (0.94 – 1.05)         | 717   | 0.92 (0.87 – 0.97)         | 0.046                |
| History of CVD                 | 306 | 0.73 (0.63 – 0.82)         | 298   | 0.70 (0.61 – 0.79)         | 0.648                |
| Normoalbuminuria               | 450 | 1.00 (0.94 – 1.05)         | 655   | 0.95 (0.90 – 1.00)         | 0.214                |
| Microalbuminuria               | 266 | 0.81 (0.71 – 0.90)         | 277   | 0.75 (0.66 – 0.84)         | 0.444                |
| Macroalbuminuria               | 168 | 0.59 (0.40 – 0.78)         | 46    | 0.54 (0.34 – 0.73)         | 0.886                |
| No microvascular complications | 314 | 1.01 (0.95 – 1.07)         | 428   | 0.98 (0.93 – 1.03)         | 0.488                |
| Microvascular complications*   | 464 | 0.82 (0.74 – 0.89)         | 546   | 0.77 (0.71 – 0.84)         | 0.395                |
| Low risk profile <sup>†</sup>  | 154 | 1.08 (1.00 – 1.14)         | 270   | 1.01 (0.94 – 1.07)         | 0.106                |

Abbreviations: BMI: body mass index; CVD: cardiovascular disease.

# Difference between men and women \* Defined as the presence of albuminuria, neuropathy or DRP; † defined as non-smoking patients without a history of CVD and microvascular complications.

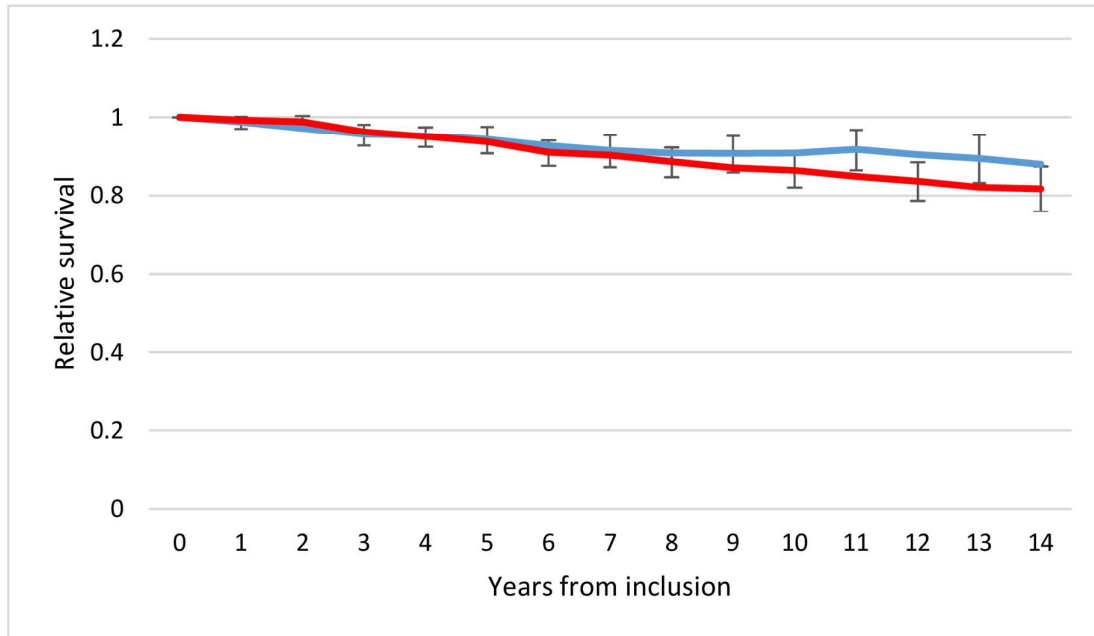

**Fig. 1. Relative survival with 95% CI for men and women with T2D. Men: blue line, Women: red line.**

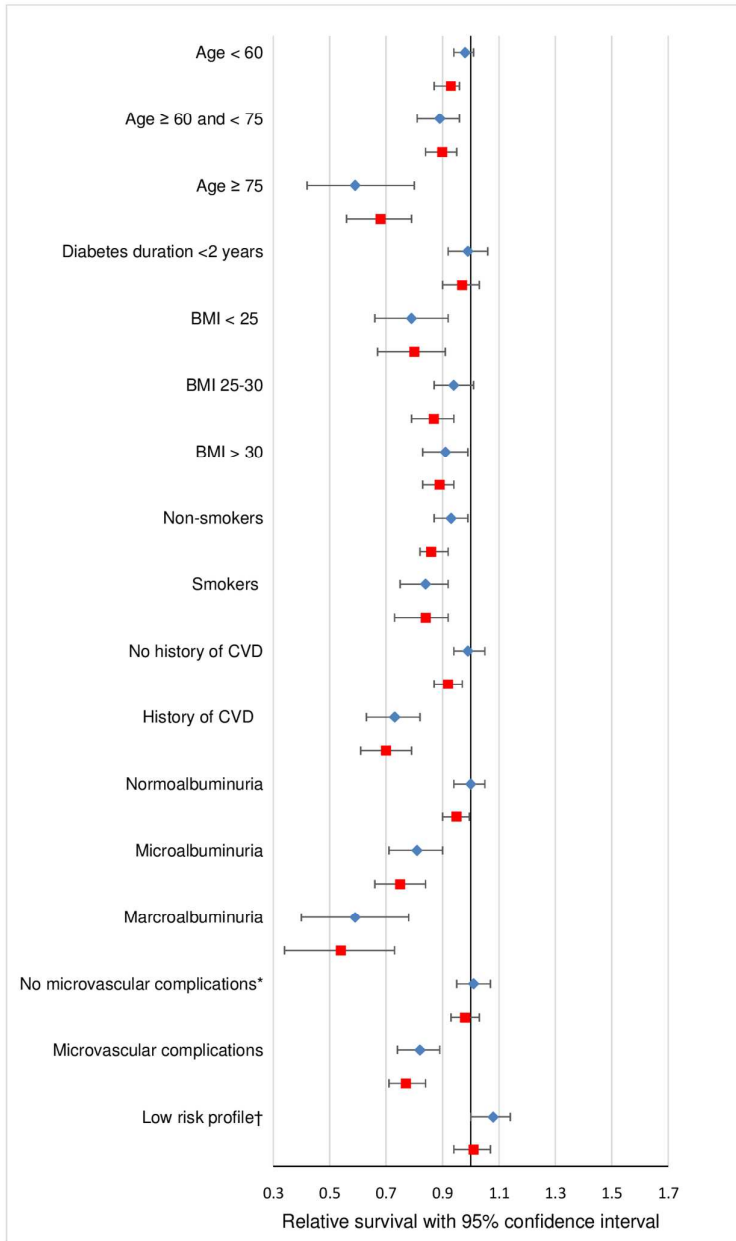

**Fig. 2. Relative survival with 95% CI for men and women with T2D after 10 years in different subgroups. Men: blue, women: red.**

**STROBE 2007 (v4) checklist of items to be included in reports of observational studies in epidemiology\***  
**Checklist for cohort, case-control, and cross-sectional studies (combined)**

| Section/Topic             | Item # | Recommendation                                                                                                                                                                                                                                                                                                                                                                                                                                                         | Reported on page # |
|---------------------------|--------|------------------------------------------------------------------------------------------------------------------------------------------------------------------------------------------------------------------------------------------------------------------------------------------------------------------------------------------------------------------------------------------------------------------------------------------------------------------------|--------------------|
| Title and abstract        | 1      | (a) Indicate the study's design with a commonly used term in the title or the abstract                                                                                                                                                                                                                                                                                                                                                                                 | 2                  |
|                           |        | (b) Provide in the abstract an informative and balanced summary of what was done and what was found                                                                                                                                                                                                                                                                                                                                                                    | 2                  |
| <b>Introduction</b>       |        |                                                                                                                                                                                                                                                                                                                                                                                                                                                                        |                    |
| Background/rationale      | 2      | Explain the scientific background and rationale for the investigation being reported                                                                                                                                                                                                                                                                                                                                                                                   | 4                  |
| Objectives                | 3      | State specific objectives, including any pre-specified hypotheses                                                                                                                                                                                                                                                                                                                                                                                                      | 4                  |
| <b>Methods</b>            |        |                                                                                                                                                                                                                                                                                                                                                                                                                                                                        |                    |
| Study design              | 4      | Present key elements of study design early in the paper                                                                                                                                                                                                                                                                                                                                                                                                                | 5                  |
| Setting                   | 5      | Describe the setting, locations, and relevant dates, including periods of recruitment, exposure, follow-up, and data collection                                                                                                                                                                                                                                                                                                                                        | 5,6                |
| Participants              | 6      | (a) <i>Cohort study</i> —Give the eligibility criteria, and the sources and methods of selection of participants. Describe methods of follow-up<br><i>Case-control study</i> —Give the eligibility criteria, and the sources and methods of case ascertainment and control selection. Give the rationale for the choice of cases and controls<br><i>Cross-sectional study</i> —Give the eligibility criteria, and the sources and methods of selection of participants | 5,6                |
|                           |        | (b) <i>Cohort study</i> —For matched studies, give matching criteria and number of exposed and unexposed<br><i>Case-control study</i> —For matched studies, give matching criteria and the number of controls per case                                                                                                                                                                                                                                                 | 5                  |
| Variables                 | 7      | Clearly define all outcomes, exposures, predictors, potential confounders, and effect modifiers. Give diagnostic criteria, if applicable                                                                                                                                                                                                                                                                                                                               | 6,7                |
| Data sources/ measurement | 8*     | For each variable of interest, give sources of data and details of methods of assessment (measurement). Describe comparability of assessment methods if there is more than one group                                                                                                                                                                                                                                                                                   | 5,6                |
| Bias                      | 9      | Describe any efforts to address potential sources of bias                                                                                                                                                                                                                                                                                                                                                                                                              | 5                  |
| Study size                | 10     | Explain how the study size was arrived at                                                                                                                                                                                                                                                                                                                                                                                                                              | 5                  |
| Quantitative variables    | 11     | Explain how quantitative variables were handled in the analyses. If applicable, describe which groupings were chosen and why                                                                                                                                                                                                                                                                                                                                           | 7                  |
| Statistical methods       | 12     | (a) Describe all statistical methods, including those used to control for confounding                                                                                                                                                                                                                                                                                                                                                                                  | 7,8                |
|                           |        | (b) Describe any methods used to examine subgroups and interactions                                                                                                                                                                                                                                                                                                                                                                                                    | 6,7,8              |
|                           |        | (c) Explain how missing data were addressed                                                                                                                                                                                                                                                                                                                                                                                                                            | NA                 |
|                           |        | (d) <i>Cohort study</i> —If applicable, explain how loss to follow-up was addressed<br><i>Case-control study</i> —If applicable, explain how matching of cases and controls was addressed                                                                                                                                                                                                                                                                              | 7,8                |



|                          |     |                                                                                                                                                                                                              |                    |
|--------------------------|-----|--------------------------------------------------------------------------------------------------------------------------------------------------------------------------------------------------------------|--------------------|
|                          |     | <i>Cross-sectional study</i> —If applicable, describe analytical methods taking account of sampling strategy                                                                                                 |                    |
|                          |     | (e) Describe any sensitivity analyses                                                                                                                                                                        | 8                  |
| <b>Results</b>           |     |                                                                                                                                                                                                              |                    |
| Participants             | 13* | (a) Report numbers of individuals at each stage of study—eg numbers potentially eligible, examined for eligibility, confirmed eligible, included in the study, completing follow-up, and analysed            | 18 (Table 2)       |
|                          |     | (b) Give reasons for non-participation at each stage                                                                                                                                                         | 18 (Table 2)       |
|                          |     | (c) Consider use of a flow diagram                                                                                                                                                                           |                    |
| Descriptive data         | 14* | (a) Give characteristics of study participants (eg demographic, clinical, social) and information on exposures and potential confounders                                                                     | 8 and 17 (Table 1) |
|                          |     | (b) Indicate number of participants with missing data for each variable of interest                                                                                                                          | NA                 |
|                          |     | (c) <i>Cohort study</i> —Summarise follow-up time (eg, average and total amount)                                                                                                                             | 8                  |
| Outcome data             | 15* | <i>Cohort study</i> —Report numbers of outcome events or summary measures over time                                                                                                                          | 9                  |
|                          |     | <i>Case-control study</i> —Report numbers in each exposure category, or summary measures of exposure                                                                                                         |                    |
|                          |     | <i>Cross-sectional study</i> —Report numbers of outcome events or summary measures                                                                                                                           |                    |
| Main results             | 16  | (a) Give unadjusted estimates and, if applicable, confounder-adjusted estimates and their precision (eg, 95% confidence interval). Make clear which confounders were adjusted for and why they were included | 9                  |
|                          |     | (b) Report category boundaries when continuous variables were categorized                                                                                                                                    | NA                 |
|                          |     | (c) If relevant, consider translating estimates of relative risk into absolute risk for a meaningful time period                                                                                             | 9                  |
| Other analyses           | 17  | Report other analyses done—eg analyses of subgroups and interactions, and sensitivity analyses                                                                                                               | 9                  |
| <b>Discussion</b>        |     |                                                                                                                                                                                                              |                    |
| Key results              | 18  | Summarise key results with reference to study objectives                                                                                                                                                     | 10                 |
| Limitations              | 19  | Discuss limitations of the study, taking into account sources of potential bias or imprecision. Discuss both direction and magnitude of any potential bias                                                   | 12,13              |
| Interpretation           | 20  | Give a cautious overall interpretation of results considering objectives, limitations, multiplicity of analyses, results from similar studies, and other relevant evidence                                   | 10,11,12,13        |
| Generalisability         | 21  | Discuss the generalisability (external validity) of the study results                                                                                                                                        | 13                 |
| <b>Other information</b> |     |                                                                                                                                                                                                              |                    |
| Funding                  | 22  | Give the source of funding and the role of the funders for the present study and, if applicable, for the original study on which the present article is based                                                | 13                 |

\*Give information separately for cases and controls in case-control studies and, if applicable, for exposed and unexposed groups in cohort and cross-sectional studies.

**Note:** An Explanation and Elaboration article discusses each checklist item and gives methodological background and published examples of transparent reporting. The STROBE checklist is best used in conjunction with this article (freely available on the Web sites of PLoS Medicine at <http://www.plosmedicine.org/>, Annals of Internal Medicine at <http://www.annals.org/>, and Epidemiology at <http://www.epidem.com/>). Information on the STROBE Initiative is available at [www.strobe-statement.org](http://www.strobe-statement.org).

# BMJ Open

## Sex differences in survival of patients with type 2 diabetes in primary care (ZODIAC-50).

|                                 |                                                                                                                                                                                                                                                                                                                                                                                                                                                                                         |
|---------------------------------|-----------------------------------------------------------------------------------------------------------------------------------------------------------------------------------------------------------------------------------------------------------------------------------------------------------------------------------------------------------------------------------------------------------------------------------------------------------------------------------------|
| Journal:                        | <i>BMJ Open</i>                                                                                                                                                                                                                                                                                                                                                                                                                                                                         |
| Manuscript ID                   | bmjopen-2017-015870.R1                                                                                                                                                                                                                                                                                                                                                                                                                                                                  |
| Article Type:                   | Research                                                                                                                                                                                                                                                                                                                                                                                                                                                                                |
| Date Submitted by the Author:   | 15-Jul-2017                                                                                                                                                                                                                                                                                                                                                                                                                                                                             |
| Complete List of Authors:       | Hendriks, Steven; Isala, Diabetes centre van hateren, Kornelis; Langerhans Medical Research Group<br>Groenier, Klaas; University Medical Center Groningen, Department of General Practice<br>Landman, Gijs; Langerhans Medical Research Group; Gelre hospital<br>Maas, Angela; Radboud University Medical Center<br>Bilo, Henk; Isala, Diabetes centre; University Medical Center Groningen<br>Kleefstra, Nanne; Langerhans Medical Research Group; University Medical Center Groningen |
| <b>Primary Subject Heading</b>: | Diabetes and endocrinology                                                                                                                                                                                                                                                                                                                                                                                                                                                              |
| Secondary Subject Heading:      | Epidemiology                                                                                                                                                                                                                                                                                                                                                                                                                                                                            |
| Keywords:                       | type 2 diabetes, sex differences, relative survival                                                                                                                                                                                                                                                                                                                                                                                                                                     |
|                                 |                                                                                                                                                                                                                                                                                                                                                                                                                                                                                         |

SCHOLARONE™  
Manuscripts

1  
2  
3 Sex differences in survival of patients with type 2 diabetes in primary care (ZODIAC-50).  
4  
5  
6

7 Short title: Sex differences in survival with type 2 diabetes  
8  
9

10  
11 S.H. Hendriks MD<sup>1</sup>, K.J.J. van Hateren MD PhD<sup>2</sup>, K.H. Groenier PhD<sup>3</sup>, G.W.D. Landman  
12  
13 MD PhD<sup>2,4</sup>, A.H.E.M. Maas MD PhD<sup>5</sup>, H.J.G. Bilo MD PhD FRCP<sup>1,6,7</sup>, N. Kleefstra MD  
14  
15 PhD<sup>2,6</sup>  
16  
17  
18  
19

20  
21 <sup>1</sup> Diabetes Centre, Isala, Zwolle, the Netherlands

22  
23 <sup>2</sup> Langerhans Medical Research Group, Zwolle, the Netherlands

24  
25 <sup>3</sup> Department of General Practice, University of Groningen and University Medical Center  
26  
27 Groningen, Groningen, the Netherlands

28  
29 <sup>4</sup> Department of Internal Medicine, Gelre hospital, Apeldoorn, the Netherlands

30  
31 <sup>5</sup> Department of Cardiology, Radboud University Medical Center, Nijmegen, the Netherlands

32  
33 <sup>6</sup> Department of Internal Medicine, University of Groningen and University Medical Center  
34  
35 Groningen, Groningen, the Netherlands;

36  
37  
38 <sup>7</sup> Department of Internal Medicine, Isala, Zwolle, the Netherlands  
39  
40  
41

42 Corresponding author:

43  
44 Steven H. Hendriks

45  
46 Diabetes Centre, Isala

47  
48 Dr. Spanjaardweg 11, 2<sup>nd</sup> floor, 8025 BT Zwolle; the Netherlands

49  
50 T: +31-384247763; F: +31-384247695

51  
52 E: [stevenh\\_hendriks@hotmail.com](mailto:stevenh_hendriks@hotmail.com)  
53  
54  
55  
56  
57  
58  
59  
60

## Abstract

*Objective:* To investigate sex differences in survival of primary care treated patients with type 2 diabetes in the Netherlands.

*Setting:* Primary care.

*Participants:* A total of 1815 patients who participated in a prospective observational cohort study (ZODIAC) was included of which 56% was female. Inclusion took place in 1998, 1999 and 2001. Vital status was assessed in 2013.

*Main outcome measure:* Relative survival of men and women with T2DM. The relative survival rate was expressed as the ratio of observed survival of patients divided by the survival of the general population in the Netherlands with comparable age.

*Results:* After 14 years, 888 (49%) patients had died. The relative survival rate was 0.88 (0.81 – 0.94) for men and 0.82 (0.76 – 0.87) for women with type 2 diabetes after 14 years (p-value for difference between sexes = 0.169). In patients without a history of cardiovascular diseases the relative survival was 0.99 (0.94 – 1.05) in men and 0.92 (0.87 – 0.97) in women (p-value for difference between sexes = 0.046).

*Conclusions:* The survival of men and women with type 2 diabetes was 12% and 18% lower, respectively, after 14 years of follow-up compared to men and women in the general population. This corresponds to a decrease in median survival of 2.2 and 3.5 years in men and women respectively. Only for T2D patients without a history of CVD a significantly lower relative survival in women compared to men with T2D was found.

**Article summary: Strengths and limitations of this study**

- This study provides insight in the current situation concerning the survival of men and women with type 2 diabetes who are treated in primary care in the Netherlands.
- This study used the technique of relative survival analysis, hereby a comparison between the survival of type 2 diabetes patients and the expected survival of whole general population could be made.
- The survival rates of men and women in the general population were derived from mortality rates of the entire nation.
- The generalizability is limited to primary care.
- No data were known concerning clinical variables in the general population and therefore the results of the subgroups should be interpreted with caution.

## Introduction

Mortality rates in patients with type 2 diabetes (T2D) are higher compared to the general population, which is predominantly caused by a higher occurrence of cardiovascular diseases in patients with T2D (1–3). This excess mortality rate is described to be more pronounced in women compared to men with T2D (2–5). In a recent meta-analysis, the relative risk for mortality of incident coronary heart disease was 2.8 in women and 2.0 in men compared to men and women without diabetes, respectively (2).

Current knowledge on sex differences in mortality is mostly based on older cohort studies.

Whether these results are still reflecting current practice is less clear, as the care for patients with T2D has significantly improved over the last years (6). In the Netherlands, most patients with T2D receive protocol-based treatment exclusively in primary care. The mortality in this population is low, which is probably the result of a general improvement in quality of diabetes care over the last years (7). It is less well established whether sex differences in mortality also exist in well-controlled primary care patients. Only a few studies have been recently conducted in countries with a comparable care system to the Netherlands (8–10). A study from Norway also described a more pronounced excess mortality rate in women with T2D, however this study also included secondary care treated patients (10). A retrospective study from the U.K in primary care found only a slightly higher hazard ratio for all-cause mortality in women than in men with T2D, when compared with non-diabetics (8).

The aim of the present study was to investigate the survival of prospectively followed men and women with T2D, treated in primary care, compared to men and women in the general population.

## Materials and Methods

### *Study population and design*

1  
2  
3 The study population consisted of patients who were included in the Zwolle Outpatient  
4 Diabetes Project Integrating Available Care (ZODIAC) study. This study was initiated in  
5 1998, in the Zwolle region of the Netherlands. The design and details of this study have been  
6 published previously (11). In this study, general practitioners were assisted by hospital-based  
7 diabetes specialist nurses in their care of patients with T2D. In the first year, 1,143 patients  
8 with T2D were included in this prospective cohort study. Another 127 and 545 patients with  
9 T2D entered this study in 1999 and 2001 respectively, resulting in a combined cohort of 1,815  
10 patients. All patients with T2D were selected from general practices in Zwolle region of the  
11 Netherlands. Patients with a very short life expectancy or insufficient cognitive capabilities  
12 were excluded from participation as the care for these patients has not been delegated to  
13 diabetes specialist nurses. Whether the life expectancy was long enough to be included in the  
14 ZODIAC study was based on the judgement of the general practitioners.

15  
16 The survival of this cohort was compared with the expected survival of men and women with  
17 the same age from the general population in the Netherlands. These expected survival rates  
18 were derived from data provided by Statistics Netherlands. This organization provides  
19 survival rates for men and women of every age in the Netherlands (12).

20  
21 This study was approved by the local ethical committee of Isala, Zwolle, the Netherlands. All  
22 patients gave written informed consent.

#### 23 24 25 *Data collection and measurements*

26  
27 Before participating in the ZODIAC study, T2D was already diagnosed in all individuals by  
28 their general practitioners based on the guidelines of the Dutch College of General  
29 Practitioners (2 times a fasting plasma glucose level  $\geq 7$  mmol/l or one time a non-fasting  
30 plasma glucose level  $\geq 11.1$  mmol/l accompanied by symptoms of hyperglycemia) (13).

1  
2  
3 Information on cardiovascular diseases, smoking and medication use was collected during the  
4  
5 check-up of the patient by the general practitioner or practice nurse at baseline of the study.  
6  
7 Patients were considered to have a history of CVD if a history of angina pectoris, myocardial  
8  
9 infarction, percutaneous transluminal coronary angioplasty, coronary artery bypass grafting,  
10  
11 stroke or a transient ischemic attack was documented in the patient record of the general  
12  
13 practice. Data on heart failure was not collected as it was not properly documented at  
14  
15 baseline. Smoking was included in the analyses as a categorical variable (yes/no). Laboratory  
16  
17 and physical assessment data were collected at baseline during the annual check-up of the  
18  
19 patients by their general practitioner and practice nurse and included non-fasting lipid profile,  
20  
21 glycated hemoglobin (HbA1c), serum creatinine (SCr), urinary albumin-to-creatinine ratio  
22  
23 (ACR), blood pressure and information about neuropathy and diabetic retinopathy. ACR was  
24  
25 measured using immunonephelometry (Behring Nephelometer; Mannheim, Germany), and  
26  
27 blood pressure was measured twice with a Welch Allyn sphygmomanometer in the supine  
28  
29 position after at least 5 minutes of rest. Foot sensibility was tested with 5.07 Semmes-  
30  
31 Weinstein monofilaments. Neuropathy was defined as two or more errors in a test of three, at  
32  
33 least at one foot. Diabetic retinopathy (DRP) was investigated with a retinal camera and the  
34  
35 fundus photos were judged by an ophthalmologist. Microalbuminuria was defined as an  
36  
37 albumin-to-creatinine ratio between 3.5 and 35 mg/mmol for women and between 2.5 and 25  
38  
39 mg/mmol for men. Macroalbuminuria was defined as an albumin-to-creatinine ratio > 35  
40  
41 mg/mmol for women and > 25 mg/mmol for men. The same methods were used in each  
42  
43 baseline year to measure the laboratory and physical assessment data.  
44  
45  
46  
47  
48  
49  
50

### 51 *Clinical endpoints*

52  
53 The primary end-point was the relative survival rate of men and women with T2D compared  
54  
55 with the general population in the Netherlands. Secondary end-points were the relative  
56  
57  
58  
59  
60



1  
2  
3 survival rates of patients with T2D in different subgroups, and the median survival of men  
4  
5 and women. Subgroups for the relative survival analyses were defined for: age (<60, 60-75  
6  
7 and >75 years), Body Mass Index (BMI) (<25, 25-30 and >30 kg/m<sup>2</sup>), smoking, history of  
8  
9 CVD, albuminuria (normo-, micro- and macroalbuminuria), microvascular complications  
10  
11 (defined as the presence of albuminuria, neuropathy or DRP) and for patients with a low CVD  
12  
13 risk (defined as non-smoking patients without a history of CVD and microvascular  
14  
15 complications). In 2013, vital status and cause of death of T2D patients were retrieved from  
16  
17 records maintained by the hospital and the general practitioners or from the nationwide  
18  
19 Municipal Personal Records Database. Causes of death were coded according to the  
20  
21 International Classification of Diseases, 9th revision (ICD-9). Cardiovascular death was  
22  
23 defined as death in which the principal cause of death was cardiovascular in nature, using  
24  
25 ICD-9 codes 390-459.  
26  
27  
28  
29  
30  
31

### 32 *Statistical analyses*

33  
34 Statistical analyses were performed using SPSS version 20.0 for Windows (SPSS Inc.,  
35  
36 Chicago, Illinois, USA) and Stata 14 (StataCorp, College Station, Texas, USA). Baseline  
37  
38 results were expressed as mean with standard deviation (SD) or median with interquartile  
39  
40 range [IQR] for normally distributed and non-normally distributed data, respectively.  
41  
42 Differences were considered to be significant at a p-value of <0.05. Survival was calculated  
43  
44 using relative survival analysis (14). The relative survival rate was calculated by measuring  
45  
46 the ratio of survival of patients observed in our ZODIAC cohort in comparison to the survival  
47  
48 of men and women with corresponding age in the same baseline year in the general  
49  
50 population in the Netherlands. First, interval-specific and cumulative survival rates were  
51  
52 measured for both the study population and the general population, using the Hakulinen  
53  
54 method (15). The interval-specific observed survival rate for each follow-up year of the study  
55  
56  
57  
58  
59  
60

1  
2  
3 population was calculated based on the number of patients at risk, the number of deaths and  
4  
5 the number of patients lost to follow-up in each year. The interval-specific expected survival  
6  
7 rate for the general population was calculated using yearly-specific survival data of the  
8  
9 general population (12). Consequently, the cumulative survival rate was measured for both  
10  
11 the study group and the general population. Finally, the relative cumulative survival rate was  
12  
13 calculated. The relative cumulative survival rate for the total study population is described for  
14  
15 each of the 14 follow-up years for men and women separately. To investigate whether the  
16  
17 relative survival was significant different between sexes, the p-value was calculated at 14  
18  
19 years of follow-up. For the subgroup analyses, the relative cumulative survival rate is only  
20  
21 described after 10 years of follow-up. Cumulative survival rates after 10 years are described  
22  
23 due to the fact that 14 years survival data were only available for patients who were included  
24  
25 in 1998. The relative cumulative survival rates after 10 years are therefore more reliable. P-  
26  
27 values for the differences between sexes were calculated at 10 years of follow-up for the  
28  
29 subgroup analyses. An estimation of the median survival of the study population was  
30  
31 calculated using linear interpolation. For the general population, linear extrapolation with the  
32  
33 average difference between the cumulative survivals of the general population was conducted  
34  
35 first, before using linear interpolation to estimate the median survival (see supplementary file  
36  
37 1).

## 38 39 40 41 42 43 44 45 **Results**

46  
47 Baseline results of the study population are described in Table 1. Fifty-six percent of the  
48  
49 patients were female. Mean age was 65.0 (11.8) years in men and 68.6 (11.6) years in women.  
50  
51 The median diabetes duration was 4.0 [1.8-9.0] and 5.0 [2.0-10.0] years in men and women,  
52  
53 respectively. Men smoked more frequently and had also more often albuminuria and a  
54  
55 previous history of CVD compared to women. Women had a higher systolic blood pressure, a  
56  
57  
58  
59  
60

1  
2  
3 higher BMI, and more often diabetic retinopathy than men. Men were more often on diet  
4  
5 treatment only while women were more often on insulin. Lipid lowering drugs and  
6  
7 antiplatelet drugs were more often used in men.  
8  
9

### 10 11 *Relative survival analyses*

12  
13 The incidence rate for all-cause mortality was 7.4 (6.7 – 8.2) and 7.2 (6.5 – 7.8) per 100  
14  
15 person years in men and women with T2D, respectively. The incidence rate for CVD  
16  
17 mortality was 3.1 (2.7 - 3.6) and 3.0 (2.6 - 3.4) per 100 person years in men and women with  
18  
19 T2D, respectively. The comparison between the survival of the patients with T2D and the  
20  
21 general population is presented in Table 2 and Fig. 1 for men and women separately. After 14  
22  
23 years, the relative survival rate was 0.88 (95%CI: 0.81 - 0.94) for men and 0.82 (95%CI: 0.76  
24  
25 – 0.87) for women with T2D (p-value for difference between sexes = 0.169). The estimated  
26  
27 median survival of men (mean age: 65.0) and women (mean age: 68.8) in the study population  
28  
29 was 13.8 and 13.0 years, respectively. In the general population, the estimated median  
30  
31 survival of men and women was 16.0 and 16.5 year respectively.  
32  
33  
34  
35  
36  
37

### 38 *Subgroup analyses*

39  
40 The relative survival rate after 10 years for different subgroups is described in Table 3 and  
41  
42 Fig. 2 for men and women separately. In the subgroup of T2D patients without microvascular  
43  
44 complications, the relative survival rate of men and women with T2D was 1.01 (95%CI: 0.95  
45  
46 – 1.07) and 0.98 (95%CI: 0.93 – 1.03), respectively (p = 0.488). In patients with  
47  
48 microvascular complications, the relative survival rate decreased to 0.82 (95%CI: 0.74 – 0.89)  
49  
50 for men and 0.77 (95%CI: 0.71 – 0.84) for women with T2D (p = 0.395). In men and women  
51  
52 with low CVD risk (defined as non-smoking patients without a history of CVD and  
53  
54 microvascular complications) the relative survival rate was 1.08 (95%CI: 1.00 – 1.14) and  
55  
56  
57  
58  
59  
60

1  
2  
3 1.01 (0.94 – 1.07), respectively ( $p = 0.106$ ). The relative survival rates of men <60 years, of  
4  
5 men with a BMI between 25 and 30 kg/m<sup>2</sup>, of men without a history of CVD, and of men  
6  
7 without albuminuria were not significantly different from men in the general population. The  
8  
9 relative survival rate in women in all these categories was significantly lower compared to  
10  
11 women in the general population. For patients without a history of CVD, the relative survival  
12  
13 was significantly lower in women with T2D compared to men ( $p = 0.046$ ).  
14  
15

## 16 17 **Discussion**

18  
19 In primary care treated T2D patients, the relative survival of men and women was 12% and  
20  
21 18% lower after 14 years of follow-up compared to age-matched men and women in the  
22  
23 general population, respectively. This translates into an overall decrease in median survival of  
24  
25 2.2 years in men and 3.5 years in women with T2D compared to men and women in the  
26  
27 general population. Although the relative survival of women with T2D seems to be lower than  
28  
29 in male counterparts, no significant difference between sexes was found in the total study  
30  
31 population. The survival rate in certain subgroups of men with T2D (young age, no  
32  
33 albuminuria, no history of CVD, BMI 25-30) was comparable to the survival rate of men in  
34  
35 the general population. In women in these subgroups the relative survival was significantly  
36  
37 lower compared to women without T2D. Only for T2D patients without a history of CVD a  
38  
39 significantly lower relative survival in women compared to men with T2D was found.  
40  
41  
42  
43  
44  
45

46  
47 The differences in relative survival between men and women in the total study population  
48  
49 could possibly be explained by both the higher age and longer diabetes duration in women  
50  
51 with T2D. Although women have a lower relative survival, it is not significantly lower  
52  
53 compared to men. When women would have the same age and the same diabetes duration as  
54  
55 men, the difference in relative survival would likely be smaller. This strengthens our  
56  
57 conclusion that in the total population there is no significant difference in relative survival  
58  
59  
60

1  
2  
3 between sexes. Many studies have described a higher excess mortality rate in women than in  
4  
5 men with T2D (4,5,16). In our study, a higher impact of T2D in women was only found in  
6  
7 the subgroup of patients without a history of CVD. In subgroups of patients < 60 year of age,  
8  
9 without albuminuria and with a BMI between 25-30 kg/m<sup>2</sup> the relative survival of women  
10  
11 with T2D was lower compared to women in the general population but not lower compared to  
12  
13 the relative survival of men with T2D. The comparable survival of men with T2D without a  
14  
15 history of CVD to men in the general population has partly been described before by Kalyani  
16  
17 et al. (17). In a population without ischemic heart disease, they found an increased risk for the  
18  
19 combined outcome of ischemic heart disease and mortality in women with diabetes compared  
20  
21 to women without diabetes whereas they found no differences in men.  
22  
23  
24  
25  
26

27 The decrease in median survival which is found in our study seems to be smaller than those  
28  
29 seen in previous studies. Results from the Framingham Heart Study showed that men and  
30  
31 women with diabetes lived on average 7.5 (95CI: 5.5 to 9.5) and 8.2 (95CI: 6.1 to 10.4) years  
32  
33 less compared to men and women without diabetes. However, this cohort started between  
34  
35 1948 and 1951 when treatment options for T2D were limited. In a more recent study from  
36  
37 Canada, for both men and women at the age of 55 on average a 5.0 (95CI: 4.9 to 5.1) and 6.0  
38  
39 (95CI: 5.9 to 6.1) years lower life expectancy was estimated compared to men and women  
40  
41 without diabetes (18). Although patient characteristics differ between studies and various  
42  
43 methods were used to measure survival, it may indicate that the loss of life years due to  
44  
45 diabetes is decreasing in both men and women.  
46  
47  
48  
49  
50

51 Although different theories have been described which may explain the observed sex  
52  
53 difference in the impact of diabetes on survival, it is still not completely understood.  
54  
55

56 Undertreatment of women with T2D is mentioned as a possible explaining factor. A lower  
57  
58  
59  
60

1  
2  
3 prescription percentage for aspirin and lipid lowering drugs was found in women compared to  
4  
5 men with T2D (19). However, in a recent study in primary care we did not find significant sex  
6  
7 differences in these prescribed medications (20). The sex difference in survival may also be  
8  
9 explained by a greater excess in cardiovascular risk factors between women with and without  
10  
11 T2D compared to their male counterparts (4,21). This greater excess in risk factors is  
12  
13 probably the result of a more favorable risk factor profile and a lower insulin resistance in  
14  
15 women without diabetes compared to men (21,22). Although the relatively higher risk for  
16  
17 women with T2D for fatal ischemic heart disease remained significant in various meta-  
18  
19 analyses after adjustment for other cardiovascular risk factors, it may still be an explanation as  
20  
21 only traditional risk factors were taken into account (2,4). The lower relative survival could  
22  
23 also be a result of a higher prevalence of obesity in women with T2D. In the Netherlands, the  
24  
25 prevalence of obesity is described to be 25 to 50% higher in women compared to men with  
26  
27 T2D, whereas the prevalence of overweight is 20 to 35% higher in men compared to women  
28  
29 in different age categories (20). Knowing that overweight is associated with a lower mortality  
30  
31 risk and obesity with a higher mortality risk compared to patient with a normal weight, this  
32  
33 could possibly be one of the explaining factors for the higher relative mortality rate in women  
34  
35 with T2D (23). Finally, the relative higher mortality in women with T2D may be a result of  
36  
37 underdiagnosis of ischemic heart disease in women. Women with T2D have less obstructive  
38  
39 coronary disease compared to men, with higher rates of microvascular coronary dysfunction  
40  
41 that may be more difficult to diagnose and treat (24). Also, a higher prevalence of  
42  
43 undiagnosed heart failure with preserved ejection fraction (HFpEF) is described in women  
44  
45 compared to men with T2D (25). When focusing on the common symptoms and diagnostic  
46  
47 criteria for ischemic heart disease and HFpEF, these diagnoses could be easily missed in  
48  
49 women. This may lead to undertreatment of women, resulting in a higher mortality when  
50  
51 having T2D.  
52  
53  
54  
55  
56  
57  
58  
59  
60

1  
2  
3  
4  
5 Some limitations should be mentioned. First, according to Hakulinen, relative survival is the  
6  
7 ratio of the observed survival in a group of patients compared with the expected survival in a  
8  
9 group of individuals in the general population, who are comparable with the patients  
10  
11 concerning all possible factors affecting survival, except for the disease of interest (15). Our  
12  
13 choice to compare survival of patients with T2D from the Zwolle region with to the general  
14  
15 population can therefore be criticized. However, the underlying assumption by the use of the  
16  
17 expected survivals of the general population is that the deaths directly due to T2D are a  
18  
19 negligible proportion of all deaths in the general population. Second, although no specific  
20  
21 indications exist which suggests that people in the Zwolle region are healthier or unhealthier  
22  
23 compared to the whole population in the Netherlands, we do not now that for sure. It would  
24  
25 have been better if we had used a control population from the Zwolle region, but  
26  
27 unfortunately such a control population was not available. Third, no data were known  
28  
29 concerning clinical variables in the general population, as we did not used a specific control  
30  
31 group but expected survival rates which were derived from mortality rates of the entire nation.  
32  
33 Therefore the results of the subgroups should be interpreted with caution. Fourth, the number  
34  
35 of patients in subgroups was sometimes relatively low which has decreased the precision of  
36  
37 the estimates. Fifth, selection bias has occurred in this study. The study population consisted  
38  
39 only of patients with T2D who are treated in primary care. Patients in secondary care often  
40  
41 have worse manifestations of T2D and more often macrovascular disease and will probably  
42  
43 have a lower survival. Furthermore, patients with a very short life expectancy or insufficient  
44  
45 cognitive capabilities were also excluded from participation. Although these limitations imply  
46  
47 that the generalizability of our results is limited to primary care, it is still representative for a  
48  
49 large part of the T2D population due to the fact that the majority (>85%) of the patients with  
50  
51 T2D is treated in primary care in the Netherlands (26). In this group of patients with T2D, the  
52  
53  
54  
55  
56  
57  
58  
59  
60

1  
2  
3 survival is only 2.2 years lower in men and 3.5 years lower in women compared to men and  
4  
5 women the general population. In patients with T2D with no microvascular complication and  
6  
7 in patients with a low risk profile, even no difference in survival compared to the general  
8  
9 population was found.  
10

11  
12  
13  
14 In conclusion, the relative survival in men and women with T2D compared to the general  
15  
16 population was 12% and 18% lower. The results of this study further show that survival in  
17  
18 subgroups of men (i.e. younger men, no albuminuria, no history CVD, BMI between 25 and  
19  
20 30) is comparable to men in the general population, while the survival in women in these  
21  
22 subgroups is still lower compared to women in the general population. Only in women with  
23  
24 T2D without a history of CVD the impact of diabetes on survival is higher compared to men  
25  
26 with T2D.  
27  
28  
29  
30

31  
32 Author Contributions: SHH, KJJH, KHG, HJGB and NK designed the study. SHH, KJJH and  
33  
34 GWDL acquired the data. SHH, KJJH and KHG analysed the data. SHH, KJJH, KHG,  
35  
36 GWDL, AHEMM, HJGB and NK interpreted the data. SHH and KJJH drafted the  
37  
38 manuscript. KHG, GWDL, AHEMM, HJGB and NK reviewed and edited the manuscript. All  
39  
40 authors read and approved the final manuscript.  
41

42  
43 Funding statement: This research received no specific grant from any funding agency in the  
44  
45 public, commercial or not-for-profit sectors.  
46

47  
48 Competing interests: None declared.

49  
50 Ethics approval: This study was approved by the local ethical committee of Isala, Zwolle, the  
51  
52 Netherlands. All patients gave written informed consent.

53  
54 Data sharing statement: No additional data are available.  
55  
56  
57  
58  
59  
60



## References

1. Barnett KN, Ogston SA, McMurdo MET, Morris AD, Evans JMM. A 12-year follow-up study of all-cause and cardiovascular mortality among 10,532 people newly diagnosed with Type 2 diabetes in Tayside, Scotland. *Diabet Med J Br Diabet Assoc.* 2010 Oct;27(10):1124–9.
2. Peters SAE, Huxley RR, Woodward M. Diabetes as risk factor for incident coronary heart disease in women compared with men: a systematic review and meta-analysis of 64 cohorts including 858,507 individuals and 28,203 coronary events. *Diabetologia.* 2014 Aug;57(8):1542–51.
3. Roche MM, Wang PP. Sex differences in all-cause and cardiovascular mortality, hospitalization for individuals with and without diabetes, and patients with diabetes diagnosed early and late. *Diabetes Care.* 2013 Sep;36(9):2582–90.
4. Huxley R, Barzi F, Woodward M. Excess risk of fatal coronary heart disease associated with diabetes in men and women: meta-analysis of 37 prospective cohort studies. *BMJ.* 2006 Jan 14;332(7533):73–8.
5. Lee WL, Cheung AM, Cape D, Zinman B. Impact of diabetes on coronary artery disease in women and men: a meta-analysis of prospective studies. *Diabetes Care.* 2000 Jul;23(7):962–8.
6. van Hateren KJJ, Drion I, Kleefstra N, Groenier KH, Houweling ST, van der Meer K, et al. A prospective observational study of quality of diabetes care in a shared care setting: trends and age differences (ZODIAC-19). *BMJ Open.* 2012;2(4).
7. Lutgers HL, Gerrits EG, Sluiter WJ, Ubink-Veltmaat LJ, Landman GWD, Links TP, et al. Life expectancy in a large cohort of type 2 diabetes patients treated in primary care (ZODIAC-10). *PloS One.* 2009;4(8):e6817.
8. Liang H, Vallarino C, Joseph G, Manne S, Perez A, Zhang S. Increased risk of subsequent myocardial infarction in patients with type 2 diabetes: a retrospective cohort study using the U.K. General Practice Research Database. *Diabetes Care.* 2014;37(5):1329–37.
9. Hyvärinen M, Tuomilehto J, Laatikainen T, Söderberg S, Eliasson M, Nilsson P, et al. The impact of diabetes on coronary heart disease differs from that on ischaemic stroke with regard to the gender. *Cardiovasc Diabetol.* 2009;8:17.
10. Madssen E, Vatten L, Nilsen TI, Midthjell K, Wiseth R, Dale AC. Abnormal glucose regulation and gender-specific risk of fatal coronary artery disease in the HUNT 1 study. *Scand Cardiovasc J SCJ.* 2012 Aug;46(4):219–25.
11. Ubink-Veltmaat LJ, Bilo HJG, Groenier KH, Rischen RO, Meyboom-de Jong B. Shared care with task delegation to nurses for type 2 diabetes: prospective observational study. *Neth J Med.* 2005 Mar;63(3):103–10.
12. Data published by Statistics Netherlands. In Dutch: “Centraal Bureau voor de Statistiek”. [Internet]. Available from: <http://statline.cbs.nl/Statweb/selection/?DM=SLNL&PA=70701NED&VW=T>

13. Rutten GEHM, Verhoeven S, Heine RJ, de Grauw WJC, Cromme PVM, Reenders K, et al. NHG-Standaard Diabetes Mellitus Type 2. Eerste herziening. Huisarts Wet. 1999;42(2):67–84.
14. Hockey R, Tooth L, Dobson A. Relative survival: a useful tool to assess generalisability in longitudinal studies of health in older persons. *Emerg Themes Epidemiol*. 2011;8(1):3.
15. Hakulinen T. Cancer survival corrected for heterogeneity in patient withdrawal. *Biometrics*. 1982 Dec;38(4):933–42.
16. Kanaya AM, Grady D, Barrett-Connor E. Explaining the sex difference in coronary heart disease mortality among patients with type 2 diabetes mellitus: a meta-analysis. *Arch Intern Med*. 2002 Aug 12;162(15):1737–45.
17. Kalyani RR, Lazo M, Ouyang P, Turkbey E, Chevalier K, Brancati F, et al. Sex differences in diabetes and risk of incident coronary artery disease in healthy young and middle-aged adults. *Diabetes Care*. 2014;37(3):830–8.
18. Loukine L, Waters C, Choi BC, Ellison J. Impact of diabetes mellitus on life expectancy and health-adjusted life expectancy in Canada. *Popul Health Metr*. 2012;10(1):7.
19. Wexler DJ, Grant RW, Meigs JB, Nathan DM, Cagliero E. Sex disparities in treatment of cardiac risk factors in patients with type 2 diabetes. *Diabetes Care*. 2005 Mar;28(3):514–20.
20. Hendriks SH, van Hateren KJJ, Groenier KH, Houweling ST, Maas AHEM, Kleefstra N, et al. Sex Differences in the Quality of Diabetes Care in the Netherlands (ZODIAC-45). *PloS One*. 2015;10(12):e0145907.
21. Wannamethee SG, Papacosta O, Lawlor DA, Whincup PH, Lowe GD, Ebrahim S, et al. Do women exhibit greater differences in established and novel risk factors between diabetes and non-diabetes than men? The British Regional Heart Study and British Women's Heart Health Study. *Diabetologia*. 2012 Jan;55(1):80–7.
22. Orchard TJ, Becker DJ, Kuller LH, Wagener DK, LaPorte RE, Drash AL. Age and sex variations in glucose tolerance and insulin responses: parallels with cardiovascular risk. *J Chronic Dis*. 1982 Feb;35(2):123–32.
23. Flegal KM, Kit BK, Orpana H, Graubard BI. Association of all-cause mortality with overweight and obesity using standard body mass index categories: a systematic review and meta-analysis. *JAMA*. 2013 Jan 2;309(1):71–82.
24. Tamis-Holland JE, Lu J, Korytkowski M, Magee M, Rogers WJ, Lopes N, et al. Sex differences in presentation and outcome among patients with type 2 diabetes and coronary artery disease treated with contemporary medical therapy with or without prompt revascularization: a report from the BARI 2D Trial (Bypass Angioplasty Revascularization Investigation 2 Diabetes). *J Am Coll Cardiol*. 2013 Apr 30;61(17):1767–76.

- 1  
2  
3 25. Boonman-de Winter LJM, Rutten FH, Cramer MJM, Landman MJ, Liem AH, Rutten  
4 GEHM, et al. High prevalence of previously unknown heart failure and left ventricular  
5 dysfunction in patients with type 2 diabetes. *Diabetologia*. 2012 Aug;55(8):2154–62.  
6  
7 26. InEen. In Dutch: Transparante ketenzorg diabetes mellitus, COPD en VRM rapportage  
8 zorggroepen over 2013. 2014 Jun.  
9

10  
11  
12 **Supplementary files**

13  
14 Supplementary file 1: estimation of the median survival  
15  
16  
17  
18  
19  
20  
21  
22  
23  
24  
25  
26  
27  
28  
29  
30  
31  
32  
33  
34  
35  
36  
37  
38  
39  
40  
41  
42  
43  
44  
45  
46  
47  
48  
49  
50  
51  
52  
53  
54  
55  
56  
57  
58  
59  
60

1  
2  
3 **Tables and figures**  
4  
5  
6

7 **Table 1. Baseline characteristics of the study population.**

|                                          | <b>Total (n = 1815)</b> | <b>Men (n = 800)</b> | <b>Women (n = 1015)</b> | <b>p-value</b> |
|------------------------------------------|-------------------------|----------------------|-------------------------|----------------|
| Age (years)                              | 67.0 ( $\pm$ 11.8)      | 65.0 ( $\pm$ 11.8)   | 68.6 ( $\pm$ 11.6)      | <0.001         |
| Diabetes duration (years)                | 4.0 (2.0-9.0)           | 4.0 (1.8-9.0)        | 5.0 (2.0-10.0)          | 0.017          |
| History of CVD                           | 605 (33.3)              | 307 (38.4)           | 298 (29.4)              | <0.001         |
| Smoking                                  | 342 (19.0)              | 206 (26.0)           | 136 (13.5)              | <0.001         |
| BMI (kg/m <sup>2</sup> )                 | 29.1 ( $\pm$ 4.8)       | 28.2 ( $\pm$ 4.1)    | 29.9 ( $\pm$ 5.2)       | <0.001         |
| SBP (mmHg)                               | 151.5 ( $\pm$ 24.4)     | 147.2 ( $\pm$ 23.4)  | 155.0 ( $\pm$ 24.5)     | <0.001         |
| HbA1c (mmol/mol)                         | 7.0 (6.3-8.1)           | 6.9 (6.2-8.1)        | 7.1 (6.4-8.1)           | 0.131          |
| Creatinine ( $\mu$ mol/L)                | 92.0 (82.0-104.0)       | 98.0 (89.0-109.0)    | 86.0 (77.0-97.0)        | <0.001         |
| Chol-HDL ratio                           | 4.8 (3.9-5.9)           | 4.9 (4.0-6.0)        | 4.7 (3.8-5.8)           | 0.001          |
| Retinopathy                              | 190 (10.9)              | 70 (9.1)             | 120 (12.3)              | 0.030          |
| Microalbuminuria                         | 544 (30.8)              | 267 (34.0)           | 277 (28.3)              | 0.011          |
| Macroalbuminuria                         | 114 (6.5)               | 68 (8.7)             | 46 (4.7)                | 0.001          |
| Neuropathy                               | 477 (26.6)              | 212 (26.7)           | 265 (26.6)              | 0.931          |
| Microvascular complications <sup>#</sup> | 1012 (57.7)             | 466 (59.7)           | 546 (56.1)              | 0.120          |
| Low CVD risk*                            | 424 (23.4)              | 154 (19.3)           | 270 (26.6)              | <0.001         |
| DM treatment                             |                         |                      |                         |                |
| Diet                                     | 318 (17.5)              | 158 (19.8)           | 160 (15.8)              | 0.026          |
| Oral only                                | 1230 (67.8)             | 540 (67.6)           | 690 (68.0)              | 0.834          |
| Insulin                                  | 262 (14.5)              | 99 (12.4)            | 163 (16.1)              | 0.028          |
| ACEi/ARB                                 | 433 (27.1)              | 179 (25.1)           | 254 (28.7)              | 0.108          |
| Lipid lowering drugs                     | 278 (15.6)              | 139 (17.7)           | 139 (13.9)              | 0.030          |
| Antiplatelet drugs                       | 279 (15.6)              | 139 (17.6)           | 140 (14.0)              | 0.035          |
| Death                                    | 888 (48.9)              | 381 (47.6)           | 507 (50.0)              | 0.325          |
| CVD death                                | 374 (20.6)              | 161 (20.1)           | 213 (21.0)              | 0.653          |

28 Values are depicted as n (%), mean ( $\pm$  SD), or median (IQR).

29 Abbreviations: CVD: cardiovascular disease; BMI: body mass index; SBP: systolic blood pressure;  
30 Chol-HDL: cholesterol-HDL; DM: diabetes mellitus; ACEi: angiotensin-converting enzyme inhibitor;  
31 ARB: angiotensin receptor blocker.

32 <sup>#</sup> Defined as the presence of albuminuria, neuropathy or DRP; \* defined as non-smoking patients  
33 without a history of CVD and microvascular complications.  
34  
35  
36  
37  
38  
39  
40  
41  
42  
43  
44  
45  
46  
47  
48  
49  
50  
51  
52  
53  
54  
55  
56  
57  
58  
59  
60

1  
2  
3  
4  
5  
6  
7  
8  
9  
10  
11  
12  
13  
14  
15  
16  
17  
18  
19  
20  
21  
22  
23  
24  
25  
26  
27  
28  
29  
30  
31  
32  
33  
34  
35  
36  
37  
38  
39  
40  
41  
42  
43  
44  
45  
46  
47  
48  
49

**Table 2. Relative survival for men and women with T2D compared with men and women with the same age from the general population.**

| Men       |     |       |                   |      |      |                              | Women |       |                   |      |      |                              |
|-----------|-----|-------|-------------------|------|------|------------------------------|-------|-------|-------------------|------|------|------------------------------|
| Follow-up | N   | Death | Lost to follow-up | COS  | CES  | Relative cumulative survival | N     | Death | Lost to follow-up | COS  | CES  | Relative cumulative survival |
| 0-1       | 800 | 36    | 1                 | 0.96 | 0.97 | 0.99 (0.97 - 1.00)           | 1015  | 35    | 2                 | 0.97 | 0.97 | 0.99 (0.98 – 1.00)           |
| 1-2       | 763 | 38    | 0                 | 0.91 | 0.93 | 0.97 (0.95 - 0.99)           | 978   | 32    | 0                 | 0.93 | 0.94 | 0.99 (0.97 – 1.00)           |
| 2-3       | 725 | 38    | 0                 | 0.86 | 0.90 | 0.96 (0.93 – 0.98)           | 946   | 53    | 0                 | 0.88 | 0.92 | 0.96 (0.94 – 0.98)           |
| 3-4       | 687 | 28    | 1                 | 0.82 | 0.87 | 0.95 (0.92 – 0.98)           | 893   | 40    | 2                 | 0.84 | 0.89 | 0.95 (0.92 – 0.97)           |
| 4-5       | 658 | 31    | 0                 | 0.79 | 0.83 | 0.94 (0.91 – 0.98)           | 851   | 41    | 0                 | 0.80 | 0.86 | 0.94 (0.91 – 0.96)           |
| 5-6       | 627 | 35    | 1                 | 0.74 | 0.80 | 0.93 (0.89 – 0.96)           | 810   | 52    | 4                 | 0.75 | 0.83 | 0.91 (0.88 – 0.94)           |
| 6-7       | 591 | 30    | 3                 | 0.70 | 0.77 | 0.91 (0.87 – 0.95)           | 754   | 33    | 6                 | 0.72 | 0.79 | 0.90 (0.87 – 0.94)           |
| 7-8       | 558 | 26    | 1                 | 0.67 | 0.74 | 0.91 (0.86 – 0.95)           | 715   | 40    | 0                 | 0.68 | 0.76 | 0.89 (0.85 – 0.92)           |
| 8-9       | 531 | 22    | 0                 | 0.64 | 0.71 | 0.91 (0.86 – 0.95)           | 675   | 38    | 3                 | 0.64 | 0.73 | 0.87 (0.83 – 0.91)           |
| 9-10      | 509 | 20    | 0                 | 0.62 | 0.68 | 0.91 (0.86 – 0.96)           | 634   | 30    | 0                 | 0.61 | 0.70 | 0.86 (0.82 – 0.91)           |
| 10-11     | 489 | 15    | 58                | 0.60 | 0.65 | 0.92 (0.86 – 0.97)           | 604   | 35    | 62                | 0.57 | 0.67 | 0.85 (0.80 – 0.89)           |
| 11-12     | 416 | 22    | 101               | 0.56 | 0.62 | 0.90 (0.85 – 0.96)           | 507   | 28    | 93                | 0.54 | 0.64 | 0.84 (0.79 – 0.88)           |
| 12-13     | 293 | 17    | 3                 | 0.53 | 0.59 | 0.89 (0.83 – 0.95)           | 386   | 26    | 4                 | 0.50 | 0.61 | 0.82 (0.77 – 0.88)           |
| 13-14     | 273 | 16    | 60                | 0.49 | 0.56 | 0.88 (0.81 – 0.94)           | 356   | 18    | 97                | 0.47 | 0.58 | 0.82 (0.76 – 0.87)           |

Abbreviations: N: number of patients at risk; COS: cumulative observed survival; CES: cumulative expected survival.

**Table 3. Relative survival after 10 years for different subgroups.**

| Category                       | Men |       |                   |                            | Women |       |                   |                            | p-value <sup>#</sup> |
|--------------------------------|-----|-------|-------------------|----------------------------|-------|-------|-------------------|----------------------------|----------------------|
|                                | N   | Death | Lost to follow-up | Relative survival (95% CI) | N     | Death | Lost to follow-up | Relative survival (95% CI) |                      |
| Age < 60                       | 276 | 24    | 3                 | 0.98 (0.94 – 1.01)         | 224   | 26    | 4                 | 0.93 (0.87 – 0.96)         | 0.052                |
| Age ≥ 60 and < 75              | 337 | 126   | 3                 | 0.89 (0.81 – 0.96)         | 448   | 123   | 5                 | 0.89 (0.84 – 0.95)         | 0.870                |
| Age ≥ 75                       | 187 | 154   | 1                 | 0.59 (0.42 – 0.80)         | 343   | 245   | 8                 | 0.68 (0.56 – 0.79)         | 0.909                |
| Diabetes duration <2 years     | 206 | 76    | 1                 | 0.99 (0.92 – 1.06)         | 232   | 83    | 5                 | 0.97 (0.90 – 1.03)         | 0.626                |
| BMI < 25                       | 174 | 96    | 1                 | 0.79 (0.66 – 0.92)         | 169   | 83    | 4                 | 0.80 (0.67 – 0.91)         | 0.914                |
| BMI 25-30                      | 392 | 135   | 4                 | 0.94 (0.87 – 1.01)         | 377   | 153   | 6                 | 0.87 (0.79 – 0.94)         | 0.126                |
| BMI > 30                       | 232 | 73    | 2                 | 0.91 (0.83 – 0.99)         | 465   | 154   | 7                 | 0.89 (0.83 – 0.94)         | 0.616                |
| Non-smokers                    | 583 | 226   | 5                 | 0.93 (0.87 – 0.99)         | 869   | 349   | 14                | 0.86 (0.82 – 0.92)         | 0.121                |
| Smokers                        | 206 | 76    | 2                 | 0.84 (0.75 – 0.92)         | 136   | 40    | 3                 | 0.84 (0.73 – 0.92)         | 0.931                |
| No history of CVD              | 492 | 132   | 3                 | 0.99 (0.94 – 1.05)         | 717   | 228   | 11                | 0.92 (0.87 – 0.97)         | 0.046                |
| History of CVD                 | 306 | 172   | 4                 | 0.73 (0.63 – 0.82)         | 298   | 166   | 6                 | 0.70 (0.61 – 0.79)         | 0.648                |
| Normoalbuminuria               | 450 | 116   | 3                 | 1.00 (0.94 – 1.05)         | 655   | 198   | 11                | 0.95 (0.90 – 1.00)         | 0.214                |
| Microalbuminuria               | 266 | 134   | 3                 | 0.81 (0.71 – 0.90)         | 277   | 138   | 5                 | 0.75 (0.66 – 0.84)         | 0.444                |
| Macroalbuminuria               | 68  | 45    | 1                 | 0.59 (0.40 – 0.78)         | 46    | 28    | 1                 | 0.54 (0.34 – 0.73)         | 0.886                |
| No microvascular complications | 314 | 70    | 1                 | 1.01 (0.95 – 1.07)         | 428   | 104   | 5                 | 0.98 (0.93 – 1.03)         | 0.488                |
| Microvascular complications*   | 464 | 227   | 5                 | 0.82 (0.74 – 0.89)         | 546   | 263   | 10                | 0.77 (0.71 – 0.84)         | 0.395                |
| Low risk profile <sup>†</sup>  | 154 | 21    | 1                 | 1.08 (1.00 – 1.14)         | 270   | 58    | 4                 | 1.01 (0.94 – 1.07)         | 0.106                |

Abbreviations: BMI: body mass index; CVD: cardiovascular disease. # Difference between men and women \* Defined as the presence of albuminuria, neuropathy or DRP; † defined as non-smoking patients without a history of CVD and microvascular complications.

1  
2  
3  
4  
5  
6  
7  
8  
9  
10  
11  
12  
13  
14  
15  
16  
17  
18  
19  
20  
21  
22  
23  
24  
25  
26  
27  
28  
29  
30  
31  
32  
33  
34  
35  
36  
37  
38  
39  
40  
41  
42  
43  
44  
45  
46  
47  
48  
49  
50  
51  
52  
53  
54  
55  
56  
57  
58  
59  
60

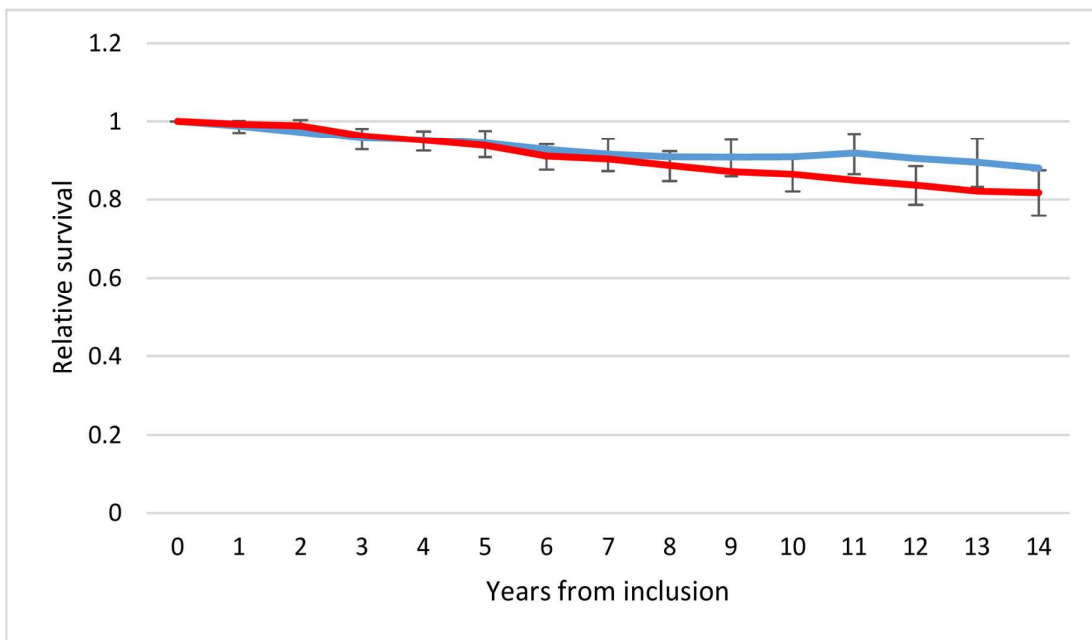

**Fig. 1. Relative survival with 95% CI for men and women with T2D. Men: blue line, Women: red line.**

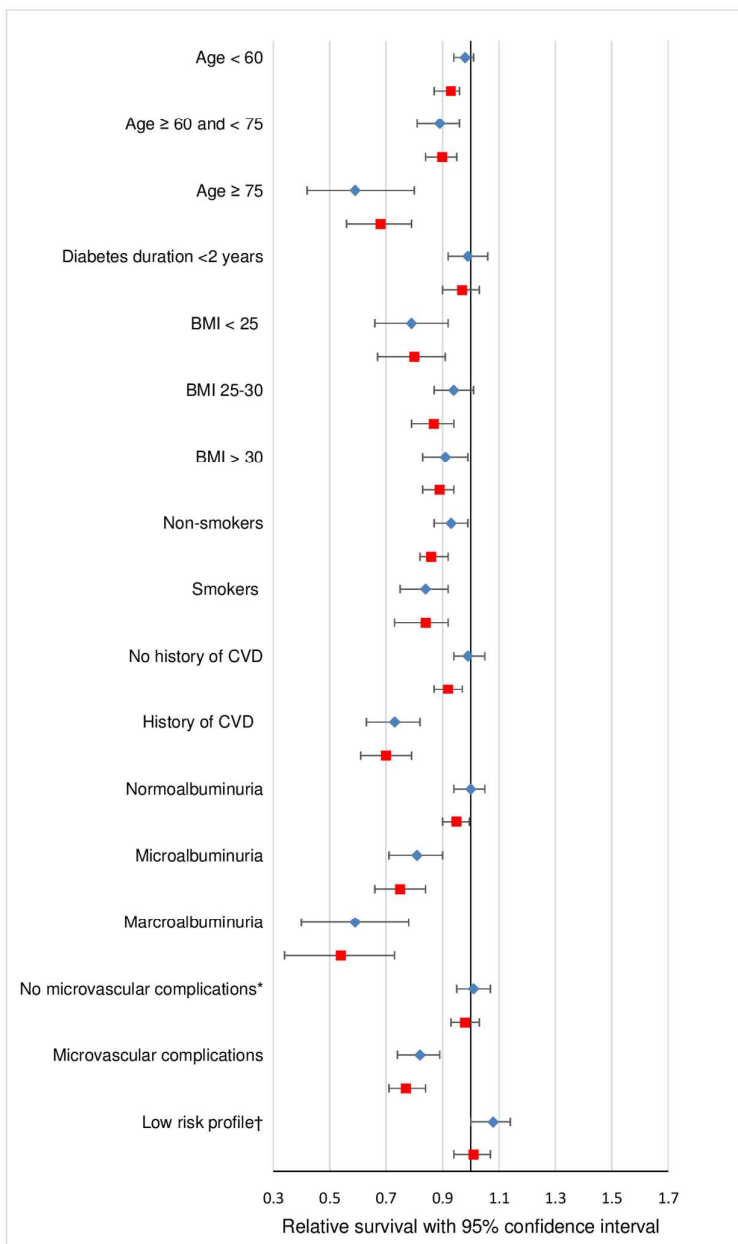

**Fig. 2. Relative survival with 95% CI for men and women with T2D after 10 years in different subgroups. Men: blue, women: red.**



1  
2  
3  
4  
5  
6  
7  
8  
9  
10  
11  
12  
13  
14  
15  
16  
17  
18  
19  
20  
21  
22  
23  
24  
25  
26  
27  
28  
29  
30  
31  
32  
33  
34  
35  
36  
37  
38  
39  
40  
41  
42  
43  
44  
45  
46  
47  
48  
49  
50  
51  
52  
53  
54  
55  
56  
57  
58  
59  
60

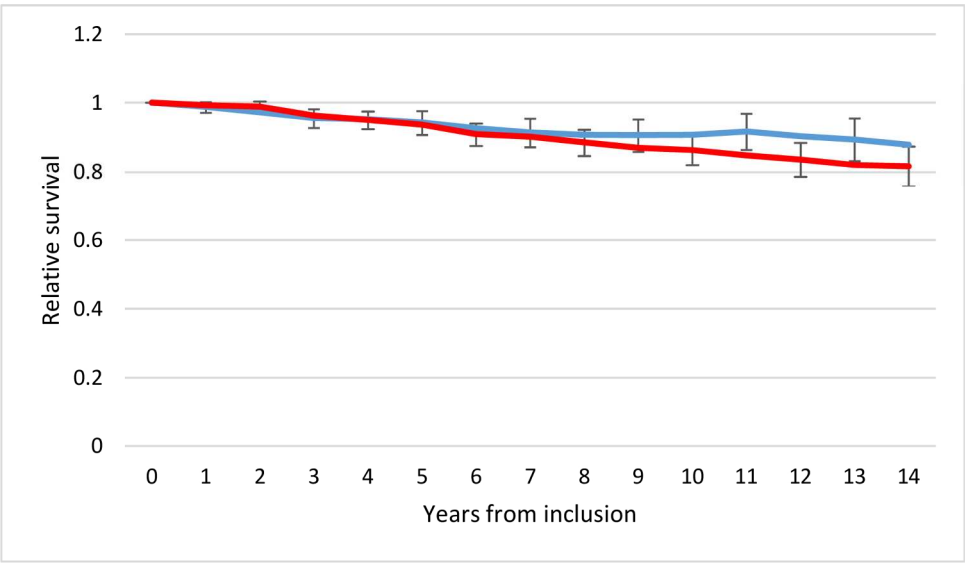

Fig. 1. Relative survival with 95% CI for men and women with T2D. Men: blue line, Women: red line.

180x110mm (300 x 300 DPI)

review only

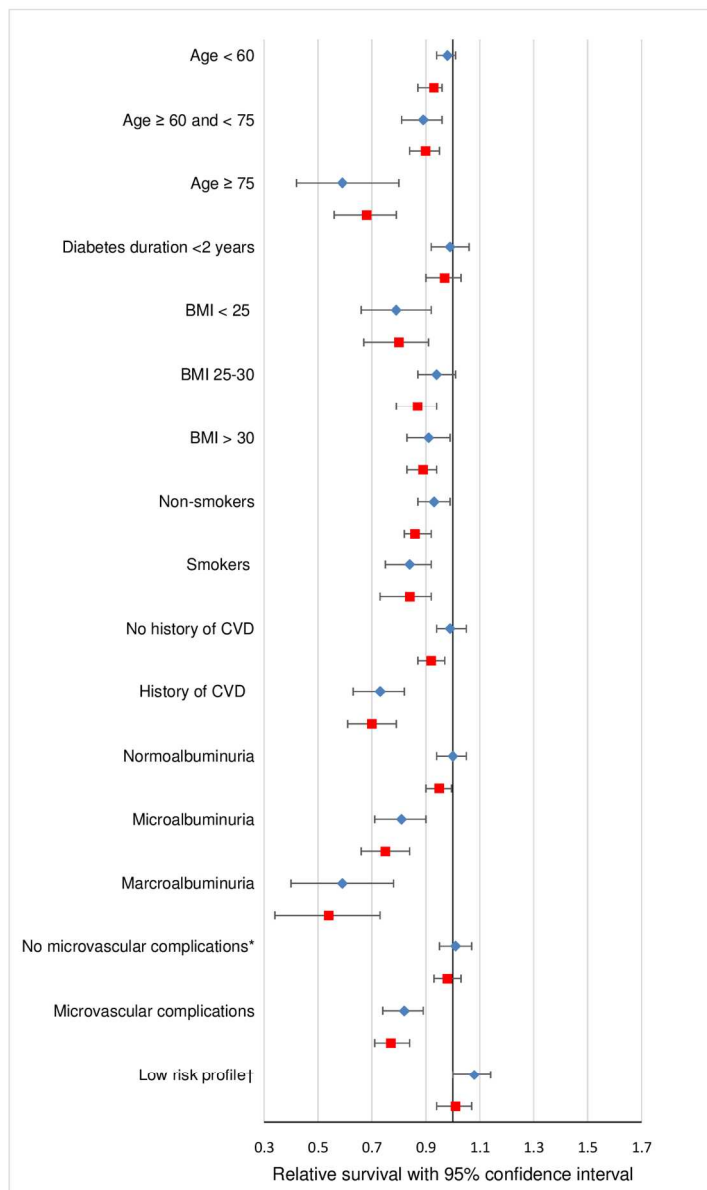

Fig. 2. Relative survival with 95% CI for men and women with T2D after 10 years in different subgroups. Men: blue, women: red.

109x176mm (300 x 300 DPI)

## Supplementary file 1 Estimation of the median survival

We used the following formula to estimate the median survival:

$$X2 \text{ (median survival)} = ((Y2 - Y1) (X3 - X1) / (Y3 - Y1)) + x1$$

Whereby (using men as an example):

X1 = the follow-up year in which more than 50% was still alive at the end (for men in our cohort, the 13<sup>th</sup> follow-up year)

X3 = the follow-up year in which less than 50% was still alive at the end (for men in our cohort, the 14<sup>th</sup> follow-up year)

Y1 = the cumulative survival at the end of X1 (for men cumulative survival 13<sup>th</sup> follow-p year = 0.5294 (rounded of 0.53))

Y2 = the median (= cumulative survival of 0.5)

Y3 = the cumulative survival at the end of X3 (for men cumulative survival 14<sup>th</sup> follow-p year = 0.4945)

$$\text{Median survival of men with T2D} = ((0.5 - 0.5294) (14 - 13) / (0.4945 - 0.5294)) + 13 = 13.8424 \text{ (rounded of 13.8).}$$

For the general population, linear extrapolation with the average difference between the cumulative survivals of the general population was conducted first, before using linear interpolation to estimate the median survival. We had to do that because after 14 years of follow-up, still more than 50% of the general population was alive (for men after 14 years the cumulative expected survival was 0.56).

For identifying X1, X3, Y1 and Y3 of the general population we used the following steps:

1. We calculated the average difference between the cumulative survivals of the 14 follow-up years (for men in our study population 0.031054)
2. We extrapolated the cumulative survival by extracting this average difference from the cumulative survival of the previous year (see table 1).
3. Finally we measured the median follow-up by using the estimated cumulative survival of the 16<sup>th</sup> and 17<sup>th</sup> follow-up year.

Table 1. Extrapolation for men in the general population.

| Follow-up year | Cumulative survival                | Comment                      |
|----------------|------------------------------------|------------------------------|
| 12 – 13        | 0.5922                             | Calculated                   |
| 13 - 14        | 0.5628                             | Calculated                   |
| 14 - 15        | $(0.5628 - 0.031054) = 0.531746$   | Estimated with extrapolation |
| 15 – 16        | $(0.531746 - 0.031054) = 0.500692$ | Estimated with extrapolation |
| 16 – 17        | $(0.500692 - 0.031054) = 0.469638$ | Estimated with extrapolation |

**STROBE 2007 (v4) checklist of items to be included in reports of observational studies in epidemiology\***  
**Checklist for cohort, case-control, and cross-sectional studies (combined)**

| Section/Topic             | Item # | Recommendation                                                                                                                                                                                                                                                                                                                                                                                                                                                         | Reported on page # |
|---------------------------|--------|------------------------------------------------------------------------------------------------------------------------------------------------------------------------------------------------------------------------------------------------------------------------------------------------------------------------------------------------------------------------------------------------------------------------------------------------------------------------|--------------------|
| Title and abstract        | 1      | (a) Indicate the study's design with a commonly used term in the title or the abstract                                                                                                                                                                                                                                                                                                                                                                                 | 2                  |
|                           |        | (b) Provide in the abstract an informative and balanced summary of what was done and what was found                                                                                                                                                                                                                                                                                                                                                                    | 2                  |
| <b>Introduction</b>       |        |                                                                                                                                                                                                                                                                                                                                                                                                                                                                        |                    |
| Background/rationale      | 2      | Explain the scientific background and rationale for the investigation being reported                                                                                                                                                                                                                                                                                                                                                                                   | 4                  |
| Objectives                | 3      | State specific objectives, including any pre-specified hypotheses                                                                                                                                                                                                                                                                                                                                                                                                      | 4                  |
| <b>Methods</b>            |        |                                                                                                                                                                                                                                                                                                                                                                                                                                                                        |                    |
| Study design              | 4      | Present key elements of study design early in the paper                                                                                                                                                                                                                                                                                                                                                                                                                | 5                  |
| Setting                   | 5      | Describe the setting, locations, and relevant dates, including periods of recruitment, exposure, follow-up, and data collection                                                                                                                                                                                                                                                                                                                                        | 5,6                |
| Participants              | 6      | (a) <i>Cohort study</i> —Give the eligibility criteria, and the sources and methods of selection of participants. Describe methods of follow-up<br><i>Case-control study</i> —Give the eligibility criteria, and the sources and methods of case ascertainment and control selection. Give the rationale for the choice of cases and controls<br><i>Cross-sectional study</i> —Give the eligibility criteria, and the sources and methods of selection of participants | 5,6                |
|                           |        | (b) <i>Cohort study</i> —For matched studies, give matching criteria and number of exposed and unexposed<br><i>Case-control study</i> —For matched studies, give matching criteria and the number of controls per case                                                                                                                                                                                                                                                 | 5                  |
| Variables                 | 7      | Clearly define all outcomes, exposures, predictors, potential confounders, and effect modifiers. Give diagnostic criteria, if applicable                                                                                                                                                                                                                                                                                                                               | 6,7                |
| Data sources/ measurement | 8*     | For each variable of interest, give sources of data and details of methods of assessment (measurement). Describe comparability of assessment methods if there is more than one group                                                                                                                                                                                                                                                                                   | 5,6                |
| Bias                      | 9      | Describe any efforts to address potential sources of bias                                                                                                                                                                                                                                                                                                                                                                                                              | 5                  |
| Study size                | 10     | Explain how the study size was arrived at                                                                                                                                                                                                                                                                                                                                                                                                                              | 5                  |
| Quantitative variables    | 11     | Explain how quantitative variables were handled in the analyses. If applicable, describe which groupings were chosen and why                                                                                                                                                                                                                                                                                                                                           | 7                  |
| Statistical methods       | 12     | (a) Describe all statistical methods, including those used to control for confounding                                                                                                                                                                                                                                                                                                                                                                                  | 7,8                |
|                           |        | (b) Describe any methods used to examine subgroups and interactions                                                                                                                                                                                                                                                                                                                                                                                                    | 6,7,8              |
|                           |        | (c) Explain how missing data were addressed                                                                                                                                                                                                                                                                                                                                                                                                                            | NA                 |
|                           |        | (d) <i>Cohort study</i> —If applicable, explain how loss to follow-up was addressed<br><i>Case-control study</i> —If applicable, explain how matching of cases and controls was addressed                                                                                                                                                                                                                                                                              | 7,8                |

|                          |     |                                                                                                                                                                                                              |                    |
|--------------------------|-----|--------------------------------------------------------------------------------------------------------------------------------------------------------------------------------------------------------------|--------------------|
|                          |     | <i>Cross-sectional study</i> —If applicable, describe analytical methods taking account of sampling strategy                                                                                                 |                    |
|                          |     | (e) Describe any sensitivity analyses                                                                                                                                                                        | 8                  |
| <b>Results</b>           |     |                                                                                                                                                                                                              |                    |
| Participants             | 13* | (a) Report numbers of individuals at each stage of study—eg numbers potentially eligible, examined for eligibility, confirmed eligible, included in the study, completing follow-up, and analysed            | 18 (Table 2)       |
|                          |     | (b) Give reasons for non-participation at each stage                                                                                                                                                         | 18 (Table 2)       |
|                          |     | (c) Consider use of a flow diagram                                                                                                                                                                           |                    |
| Descriptive data         | 14* | (a) Give characteristics of study participants (eg demographic, clinical, social) and information on exposures and potential confounders                                                                     | 8 and 17 (Table 1) |
|                          |     | (b) Indicate number of participants with missing data for each variable of interest                                                                                                                          | NA                 |
|                          |     | (c) <i>Cohort study</i> —Summarise follow-up time (eg, average and total amount)                                                                                                                             | 8                  |
| Outcome data             | 15* | <i>Cohort study</i> —Report numbers of outcome events or summary measures over time                                                                                                                          | 9                  |
|                          |     | <i>Case-control study</i> —Report numbers in each exposure category, or summary measures of exposure                                                                                                         |                    |
|                          |     | <i>Cross-sectional study</i> —Report numbers of outcome events or summary measures                                                                                                                           |                    |
| Main results             | 16  | (a) Give unadjusted estimates and, if applicable, confounder-adjusted estimates and their precision (eg, 95% confidence interval). Make clear which confounders were adjusted for and why they were included | 9                  |
|                          |     | (b) Report category boundaries when continuous variables were categorized                                                                                                                                    | NA                 |
|                          |     | (c) If relevant, consider translating estimates of relative risk into absolute risk for a meaningful time period                                                                                             | 9                  |
| Other analyses           | 17  | Report other analyses done—eg analyses of subgroups and interactions, and sensitivity analyses                                                                                                               | 9                  |
| <b>Discussion</b>        |     |                                                                                                                                                                                                              |                    |
| Key results              | 18  | Summarise key results with reference to study objectives                                                                                                                                                     | 10                 |
| Limitations              | 19  | Discuss limitations of the study, taking into account sources of potential bias or imprecision. Discuss both direction and magnitude of any potential bias                                                   | 12,13              |
| Interpretation           | 20  | Give a cautious overall interpretation of results considering objectives, limitations, multiplicity of analyses, results from similar studies, and other relevant evidence                                   | 10,11,12,13        |
| Generalisability         | 21  | Discuss the generalisability (external validity) of the study results                                                                                                                                        | 13                 |
| <b>Other information</b> |     |                                                                                                                                                                                                              |                    |
| Funding                  | 22  | Give the source of funding and the role of the funders for the present study and, if applicable, for the original study on which the present article is based                                                | 13                 |

\*Give information separately for cases and controls in case-control studies and, if applicable, for exposed and unexposed groups in cohort and cross-sectional studies.

**Note:** An Explanation and Elaboration article discusses each checklist item and gives methodological background and published examples of transparent reporting. The STROBE checklist is best used in conjunction with this article (freely available on the Web sites of PLoS Medicine at <http://www.plosmedicine.org/>, Annals of Internal Medicine at <http://www.annals.org/>, and Epidemiology at <http://www.epidem.com/>). Information on the STROBE Initiative is available at [www.strobe-statement.org](http://www.strobe-statement.org).
